# Supplementary material for: Green carbon–carbon homocoupling of terminal alkynes by a silica supported Cu(ii)-hydrazone coordination compound
Source: Royal Society of Chemistry journal article supplement (doi:10.1039/d2dt03054c), 2022-11-29
Supplement: d2dt03054c1.pdf [file d2dt03054c1.pdf]

## Electronic Supporting Information file

### Green carbon-carbon homocoupling of terminal alkynes by silica supported Cu(II)-hydrazone coordination compound

Neda Heydari,<sup>a</sup> Rahman Bikas,<sup>b,\*</sup> Milosz Siczek,<sup>c</sup> Tadeusz Lis<sup>c</sup>

<sup>a</sup> *Department of Chemistry, Faculty of Science, University of Zanjan, 45371-38791, Zanjan, Iran*

<sup>b</sup> *Department of Chemistry, Faculty of Science, Imam Khomeini International University, 34148-96818, Qazvin, Iran*

<sup>c</sup> *Faculty of Chemistry, University of Wrocław, Joliot-Curie 14, Wrocław 50-383, Poland*

#### Materials and Instrumentation

4-Aminobenzoic hydrazide, 2-hydroxy-3-methoxy benzaldehyde, copper(II) nitrate trihydrate, propionyl chloride-functionalized silica gel ( $\approx 1$  mmol/g loading) and solvents were purchased from Sigma-Aldrich and used as received. Elemental analyses (C, H, N) were performed on a Carlo ERBA Model EA 1108 analyzer. A Varian AA-220 atomic absorption spectroscopy instrument was used to measure the copper content of the compounds. The  $^1\text{H}$  and  $^{13}\text{C}$  NMR spectra were recorded from Bruker DRX-300 spectrometer in DMSO- $d_6$  solution. FT-IR spectra were taken by using a Nicolet iS10 FT-IR spectrophotometer as KBr disks. The UV-Vis spectra of solutions were recorded on a thermos-spectronic Helios Alpha spectrophotometer between 200-800 nm. Diffuse-reflectance UV-Vis spectroscopy (DRS) were recorded with Sinco S4100 instrument. Energy-dispersive spectroscopy (EDS) and scanning electron microscopy (SEM) were recorded with TESCAN MIRA III instrument. X-ray photoelectron spectroscopy (XPS) analysis was performed by using a Bes Tec 8025 instrument. EPR spectra were recorded on a Bruker ELEXSYS E 500 CW-EPR spectrometer operating at the X-band frequency ( $\approx 9.5$  GHz) and equipped with an ER 036TM NMR Teslameter and E 41 FC frequency counter. The spectra were recorded at room temperature and 77 K by using a standard temperature control system (Bruker) with a nitrogen gas flow. A SETSYS Evolution TGA instrument was used to record the

---

\* Email: [bikas@sci.ikiu.ac.ir](mailto:bikas@sci.ikiu.ac.ir); [bikas\\_r@yahoo.com](mailto:bikas_r@yahoo.com)

thermal gravimetric analysis (TGA) curves. Powdered X-ray diffraction analyses (PXRD) were provided by using a Bruker D8 ADVANCE powder diffractometer with Cu radiation and Vantec detector.

## X-ray Crystallography

The crystallographic data and structure refinement parameters are given in Table 5. The data were collected using a Kuma KM-4 diffractometer equipped with graphite-monochromated Mo K $\alpha$  radiation ( $\lambda = 0.71073 \text{ \AA}$ ) and Sapphire a CCD detector. The data collections, unit cell refinements, data reduction were performed with the *CrysAlisPro* software package.<sup>i</sup> The intensity data were collected by  $\omega$ -scan mode within  $2.8^\circ < \theta < 28^\circ$  in the triclinic system. A blue crystal of compound **1** was selected and intensity data were measured at 100 K. The structure was solved by direct methods and refined by full-matrix least squares based on  $F^2$ .

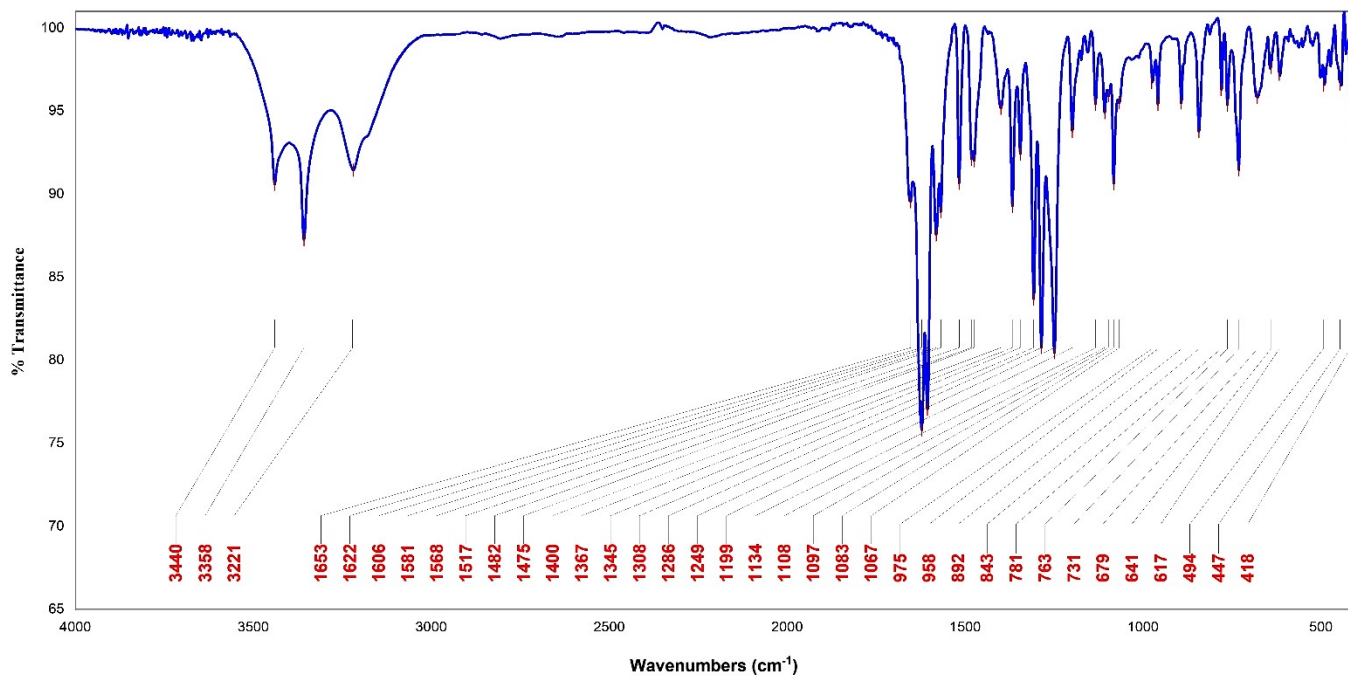

**Fig. S1.** FT-IR spectrum of H<sub>2</sub>L

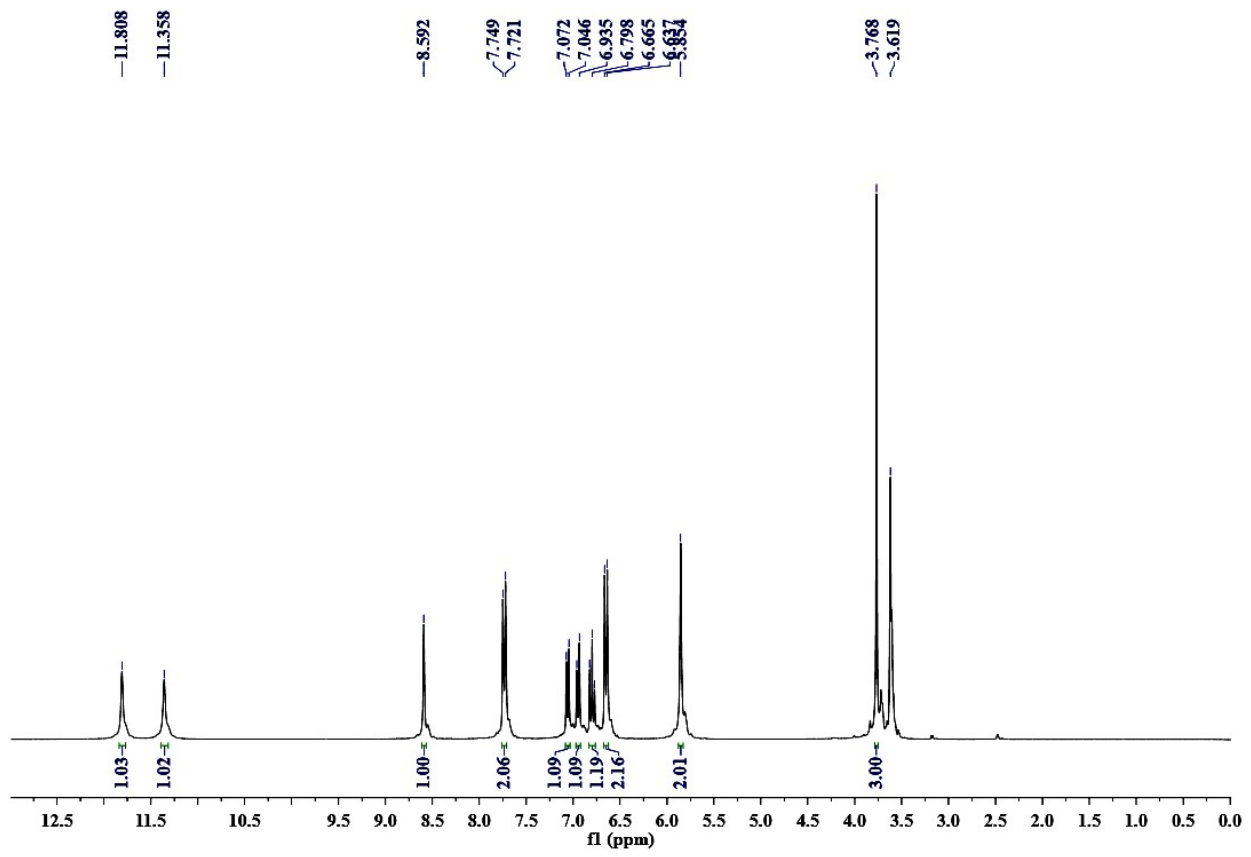

Fig. S2.  $^1\text{H}$  NMR spectrum of  $\text{H}_2\text{L}$  in  $\text{DMSO-d}_6$

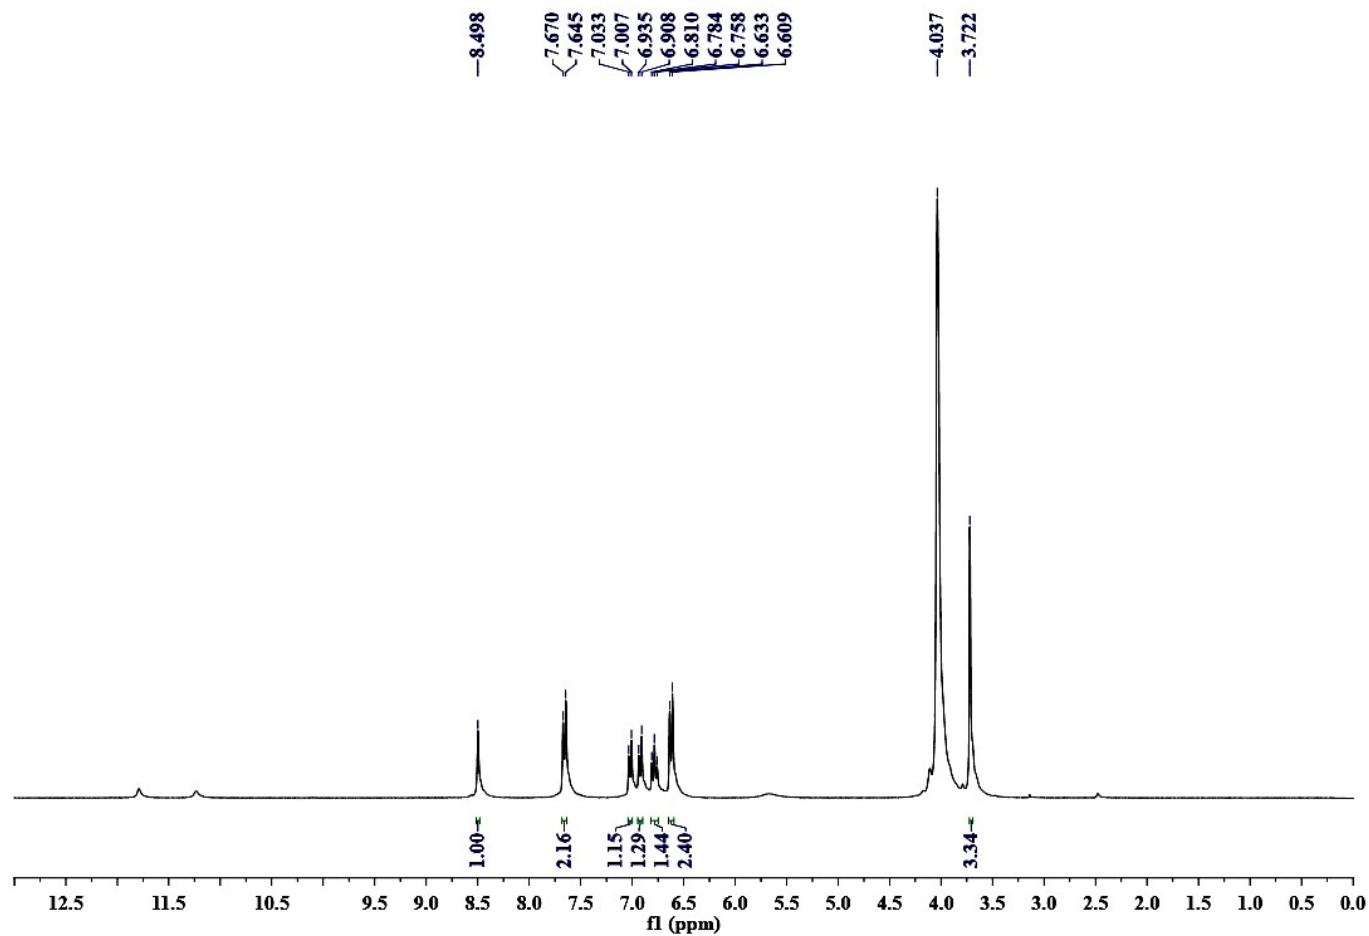

Fig. S3.  $^1\text{H}$  NMR spectrum of  $\text{H}_2\text{L}$  in  $\text{DMSO-d}_6 + \text{D}_2\text{O}$

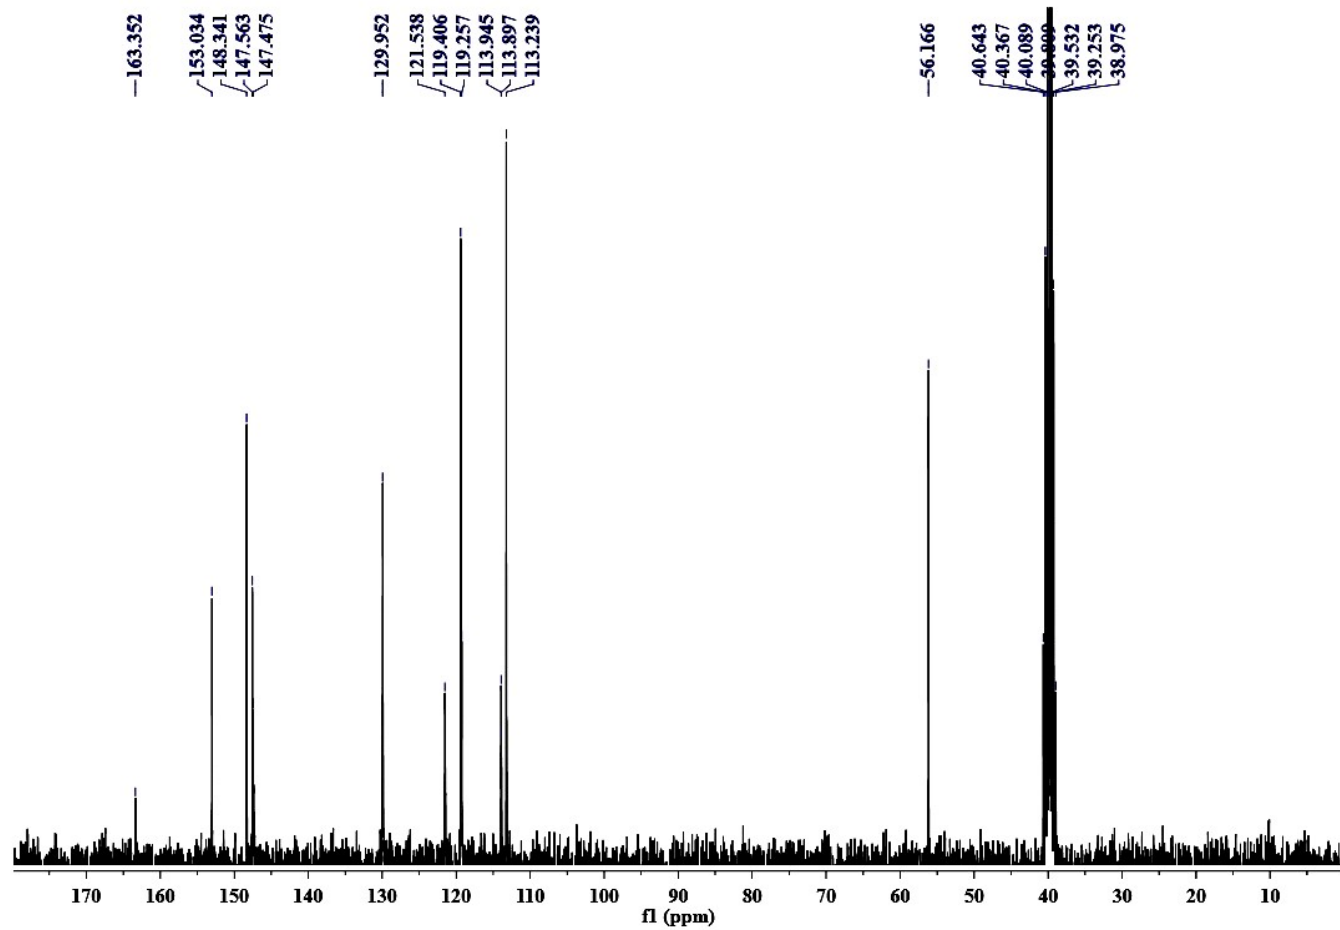

Fig. S4.  $^{13}\text{C}$  NMR spectrum of  $\text{H}_2\text{L}$  in  $\text{DMSO-d}_6$

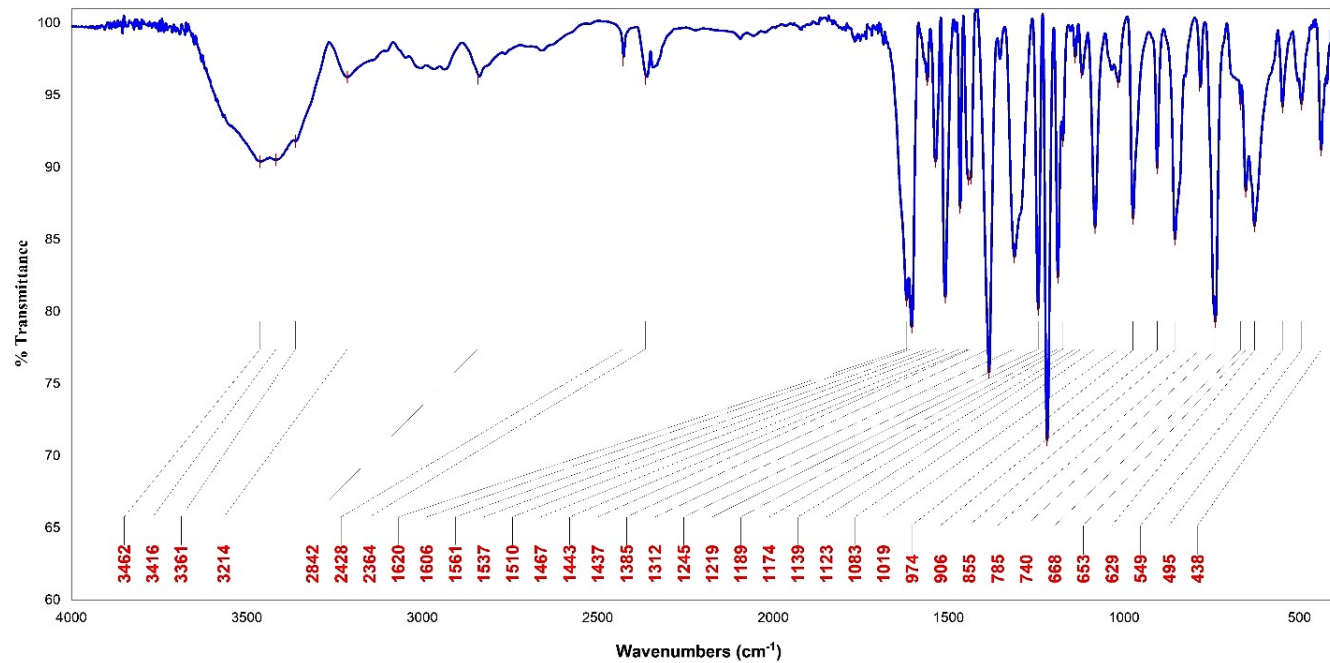

**Fig. S5.** FT-IR spectrum of compound **1**

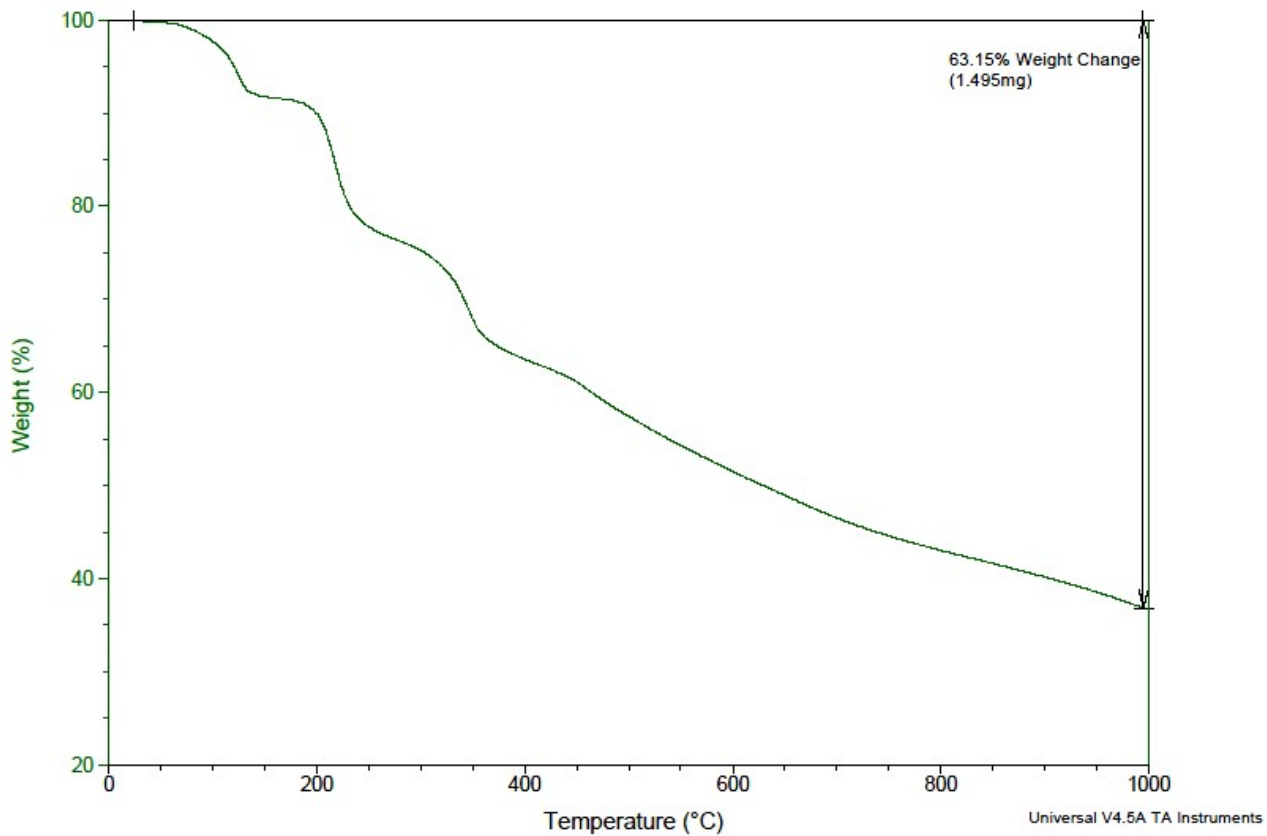

**Fig. S6.** TGA diagram of compound 1

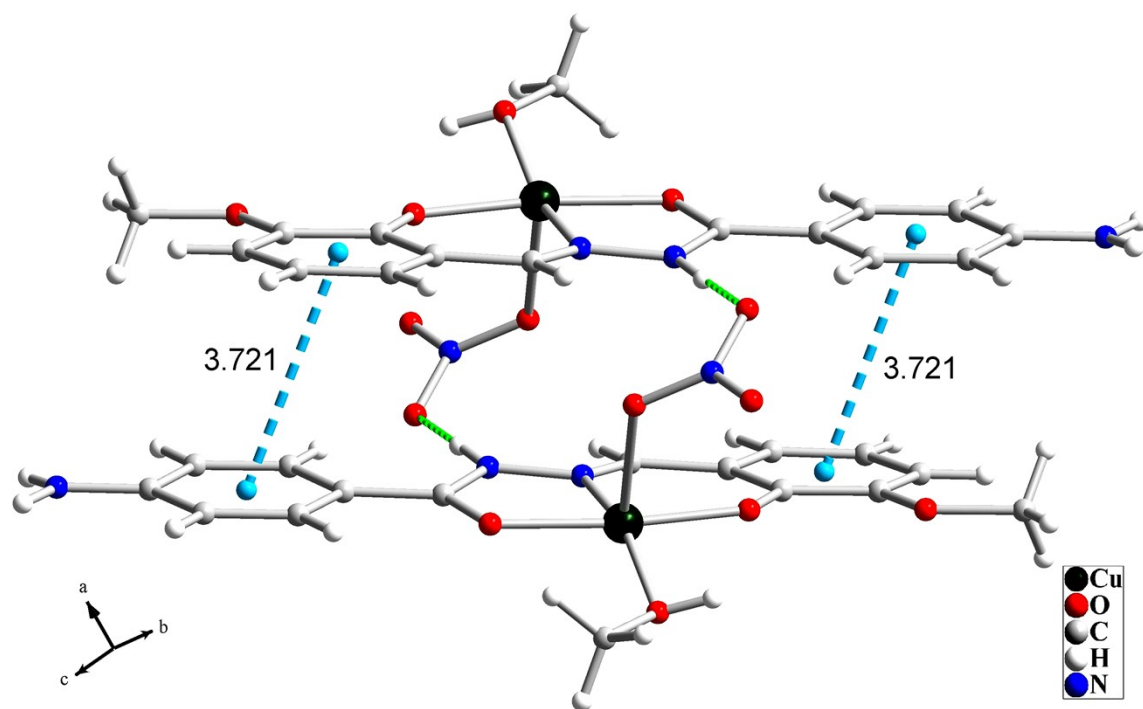

**Fig. S7.** Intermolecular  $\pi \cdots \pi$  stacking (blue dashed line) and hydrogen bond interaction (O-H $\cdots$ N) (green dashed line) in the crystal structure of **1**



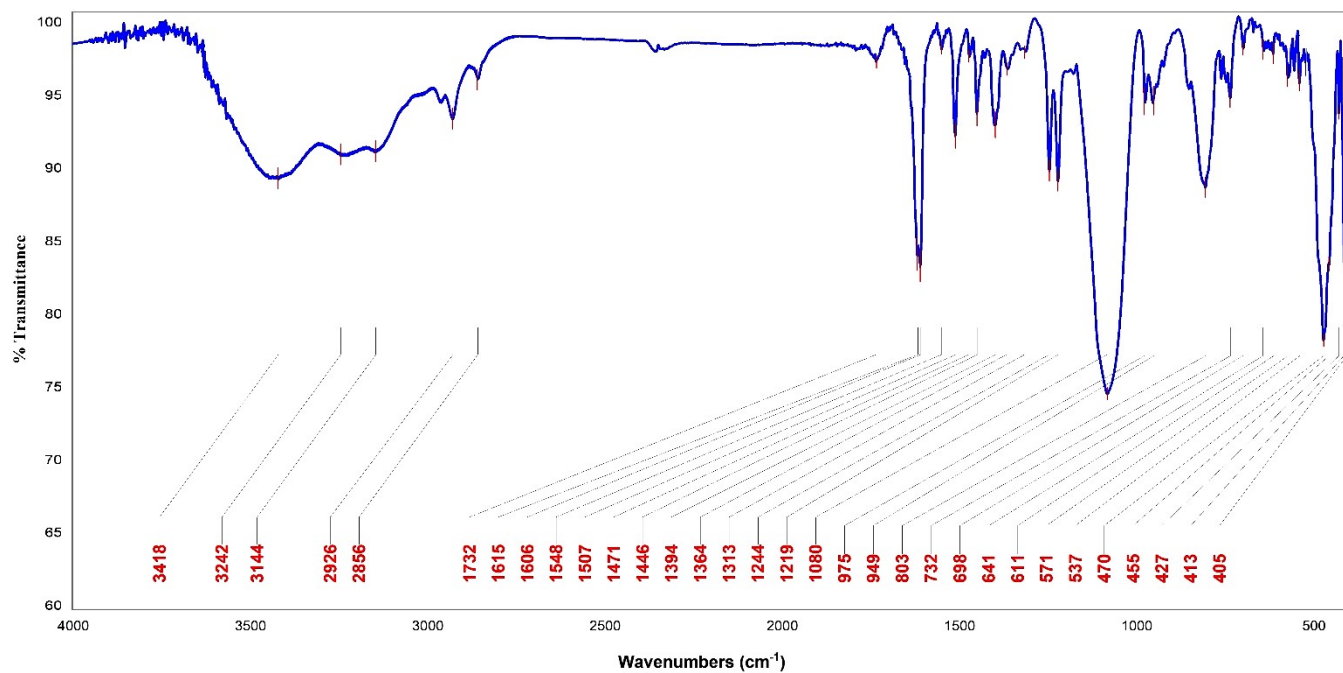

**Fig. S8.** FT-IR spectrum of supported catalyst

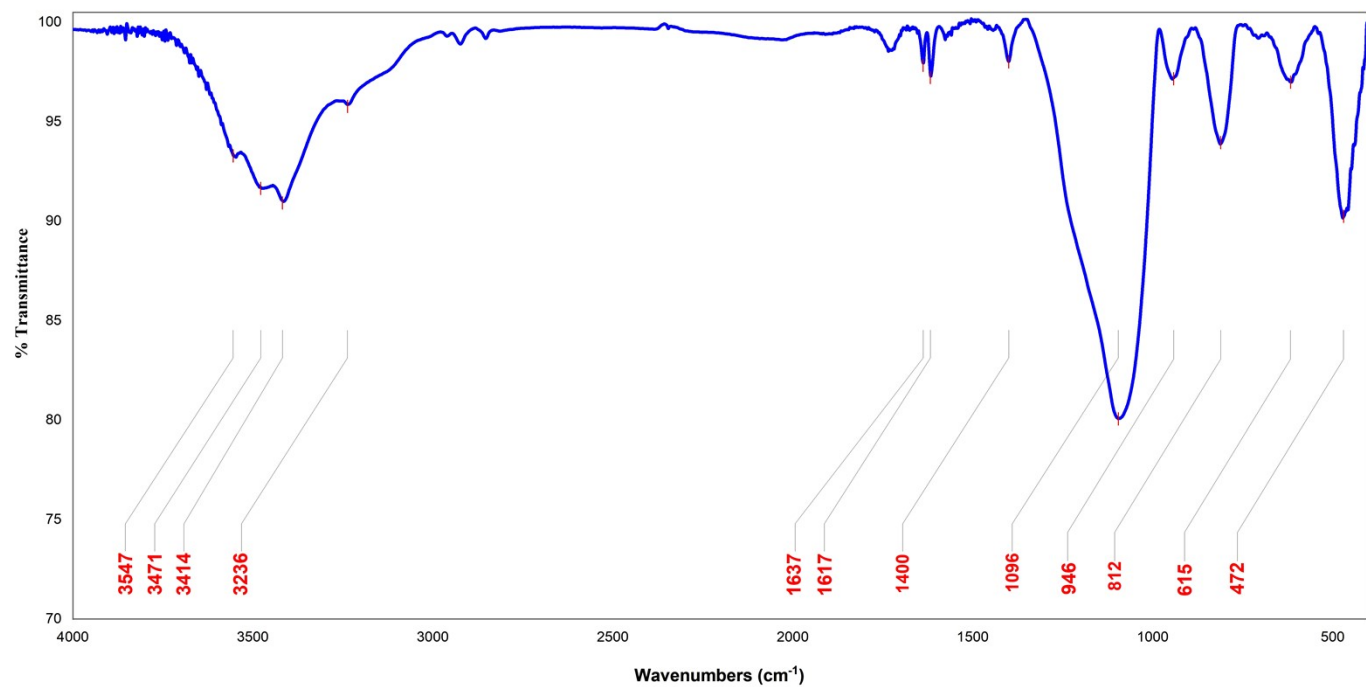

**Fig. S9.** FT-IR spectrum of propionyl chloride-functionalized silica gel

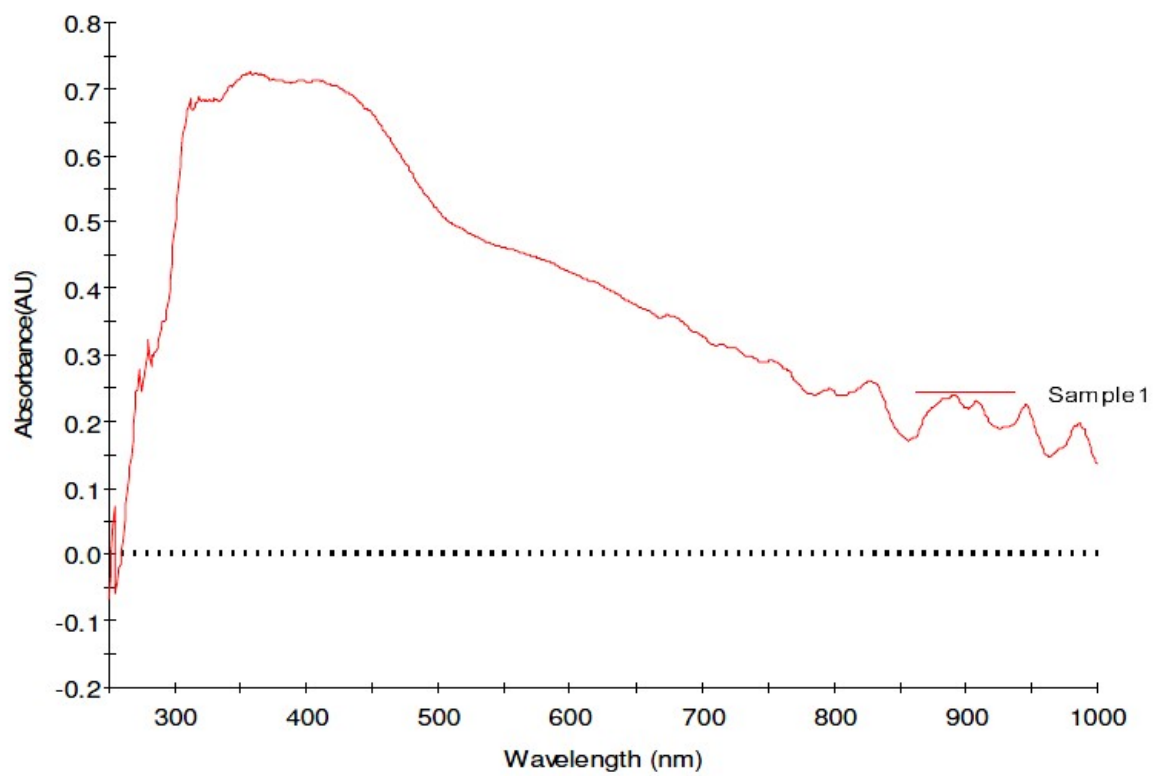

**Fig. S10.** DRS spectrum of supported catalyst

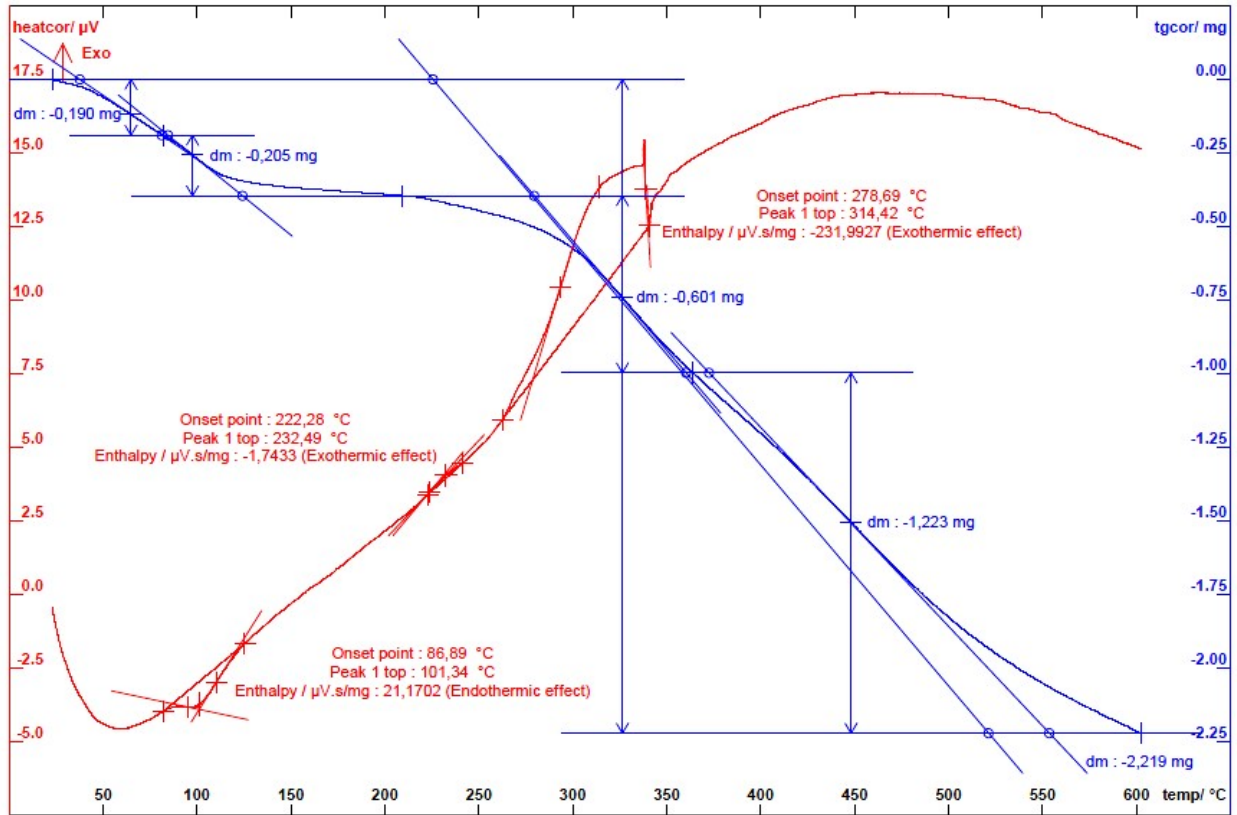

Fig. S11. TGA/DTA diagram of supported catalyst (Si-Cu)

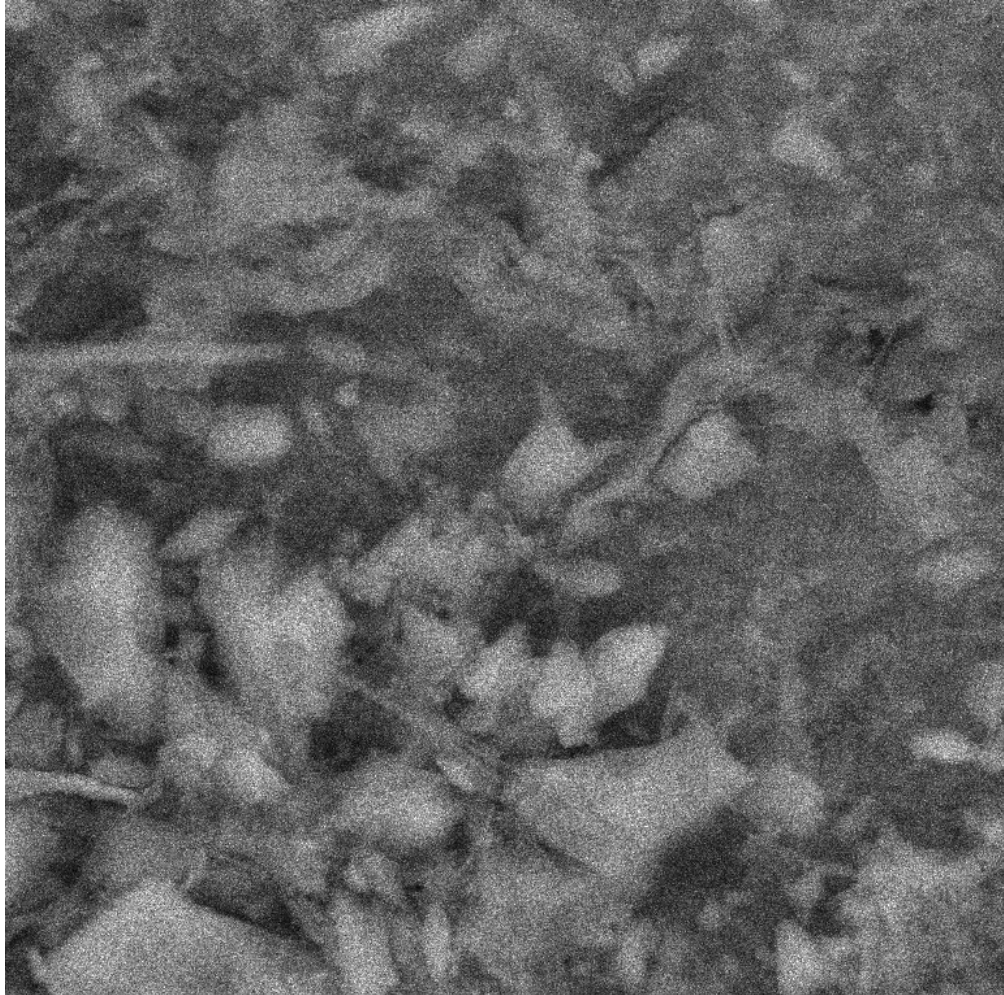

SEM HV: 15.00 kV    WD: 15.15 mm    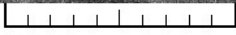    MIRA\\ TESCAN  
SEM MAG: 5.00 kx    Det: BSE    10  $\mu$ m  
View field: 43.34  $\mu$ m    Date(m/d/y): 02/16/21    

**Fig. S12.** Electron micrograph of Si-Cu

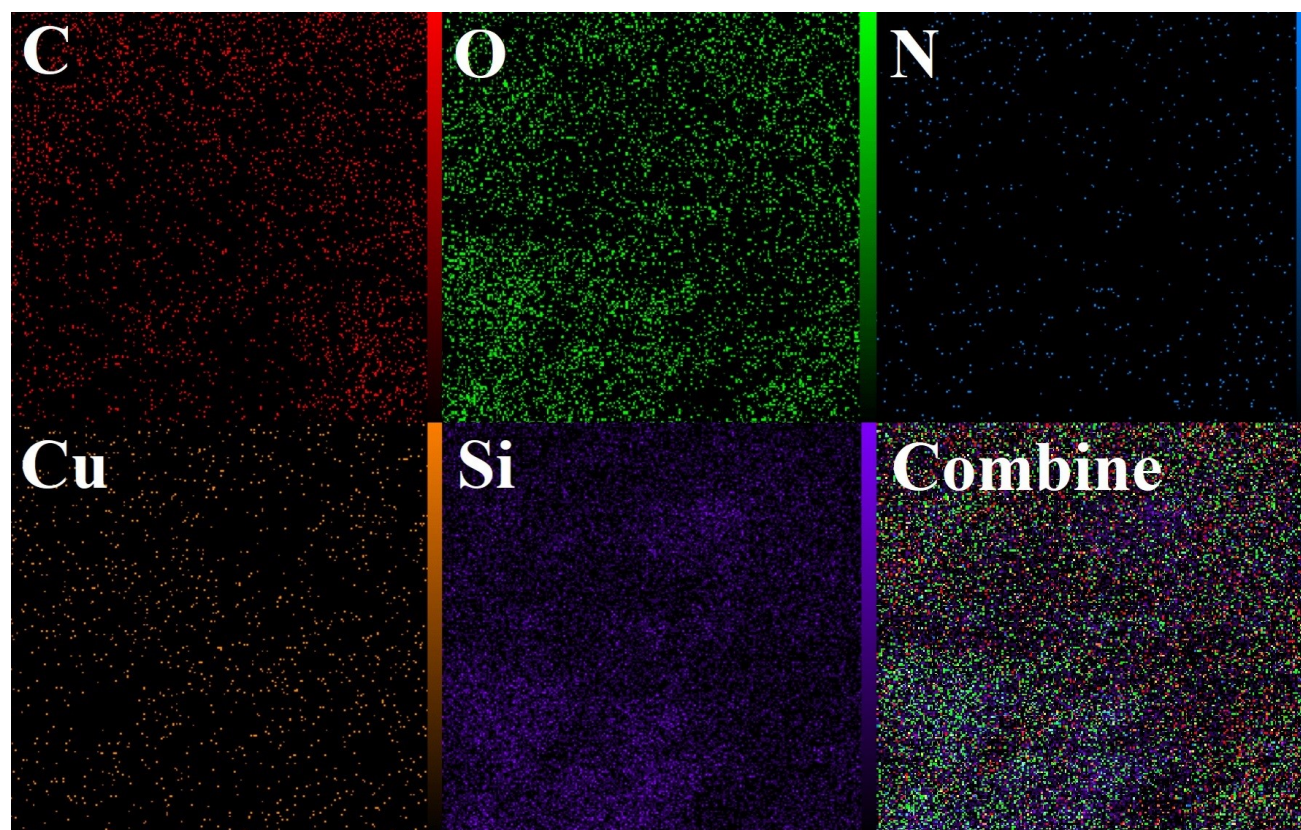

**Fig. S13.** EDS mapping images of Si-Cu



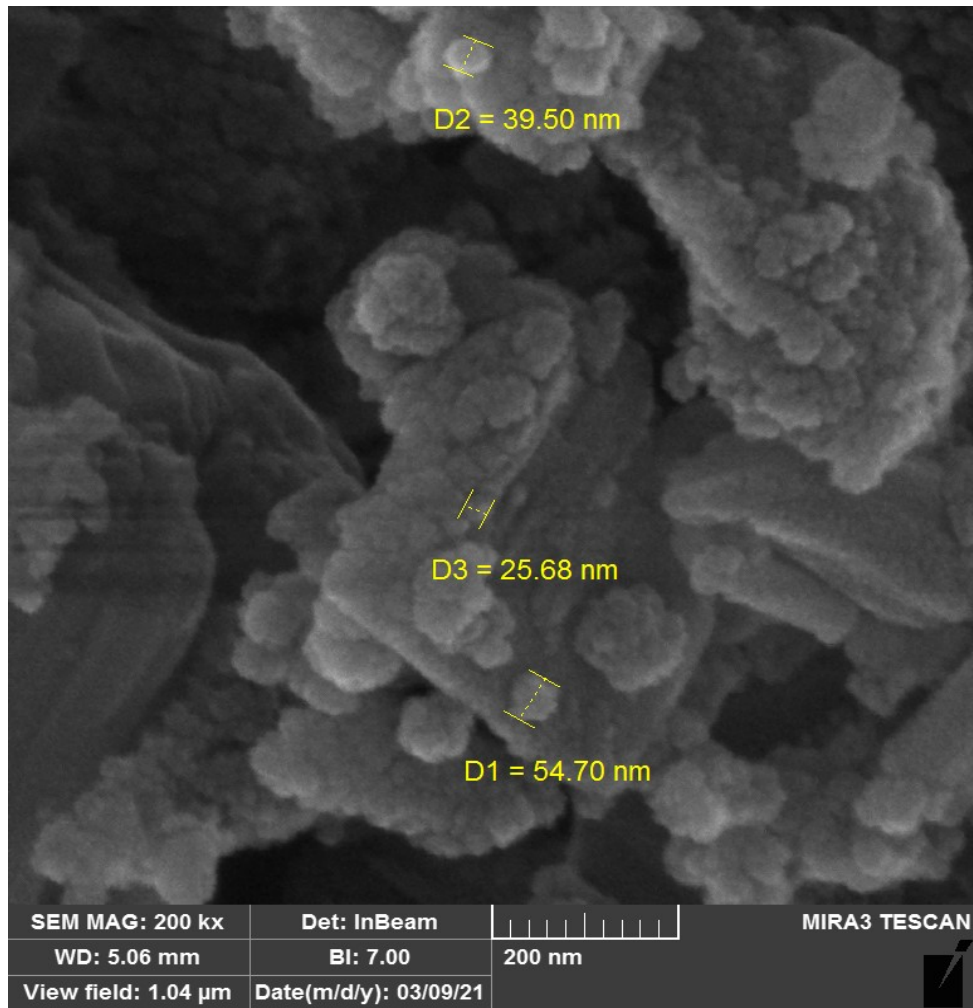

**Fig. S14a.** SEM images of Si-Cu (MAG: 200.0 kx)

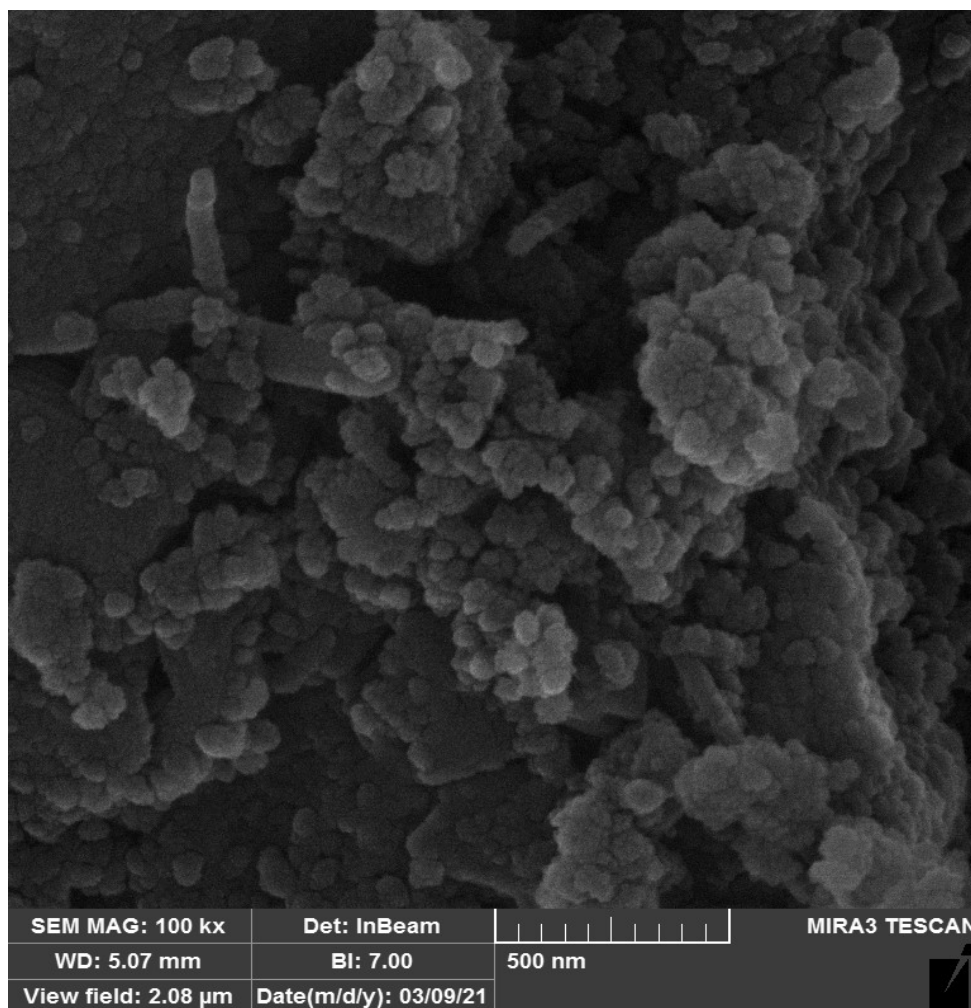

**Fig. S14b.** SEM image of Si-Cu (MAG: 100.0 kx)



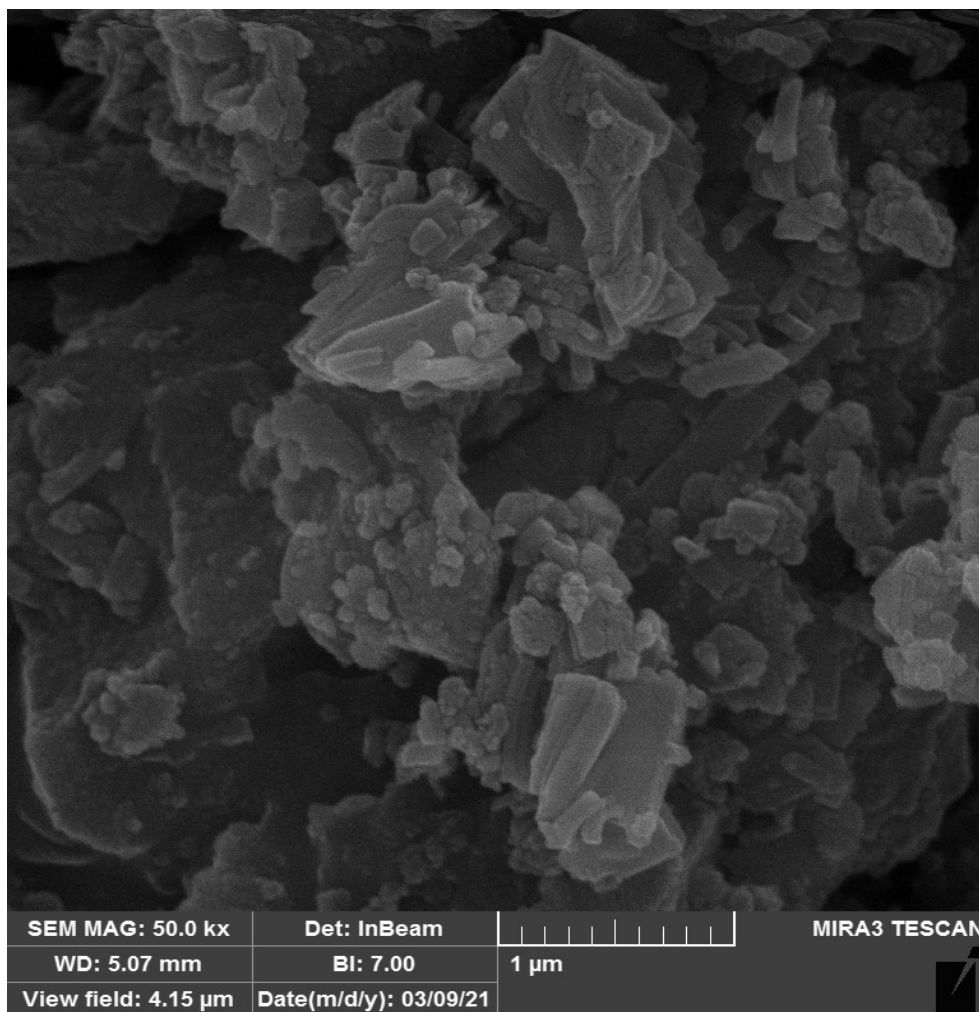

**Fig. S14c.** SEM image of **Si-Cu** (MAG: 50.0 kx)

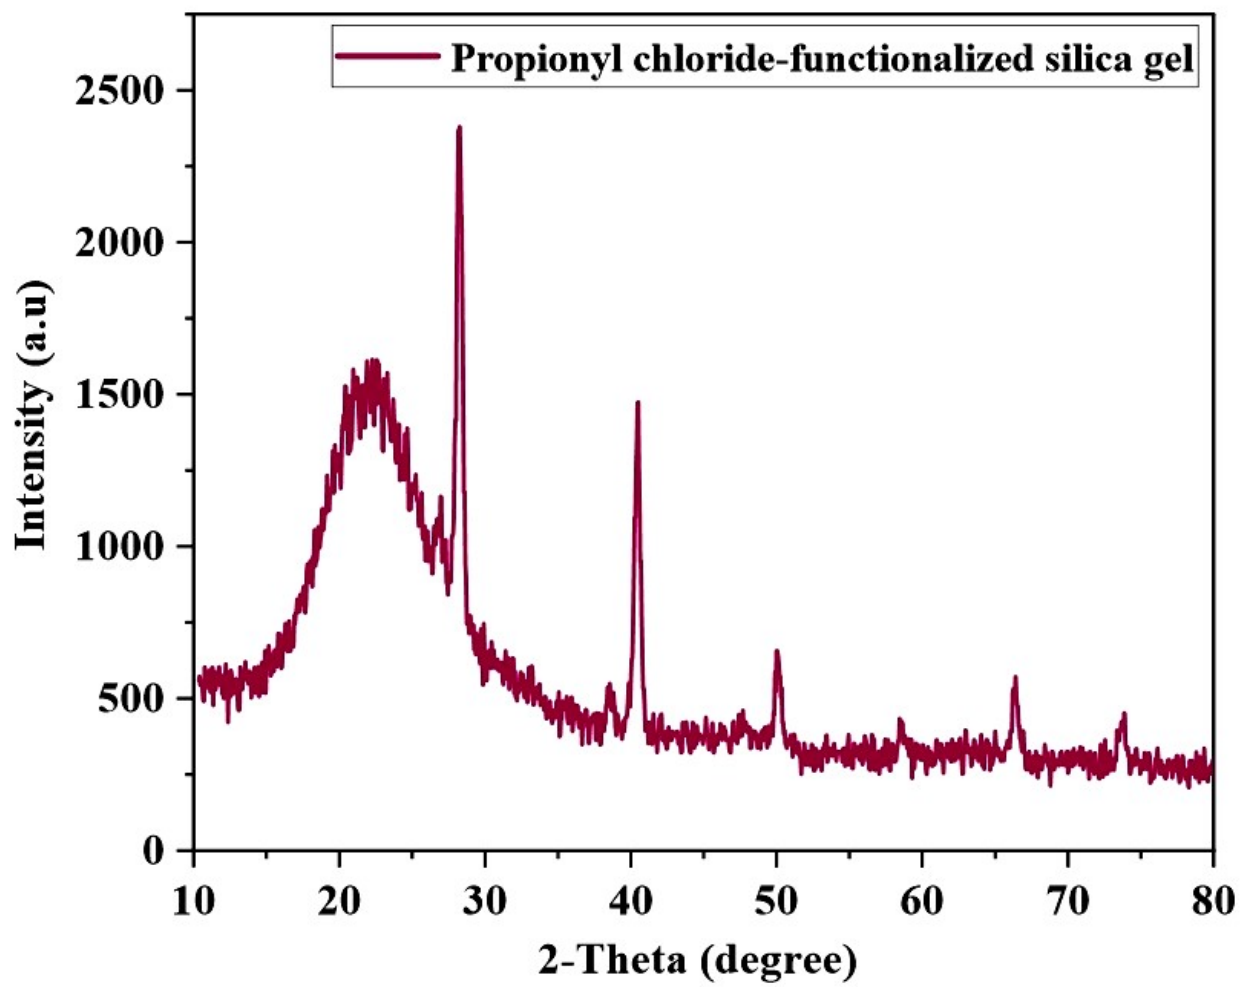

Fig. S15. XRD pattern of propionyl chloride-functionalized silica gel

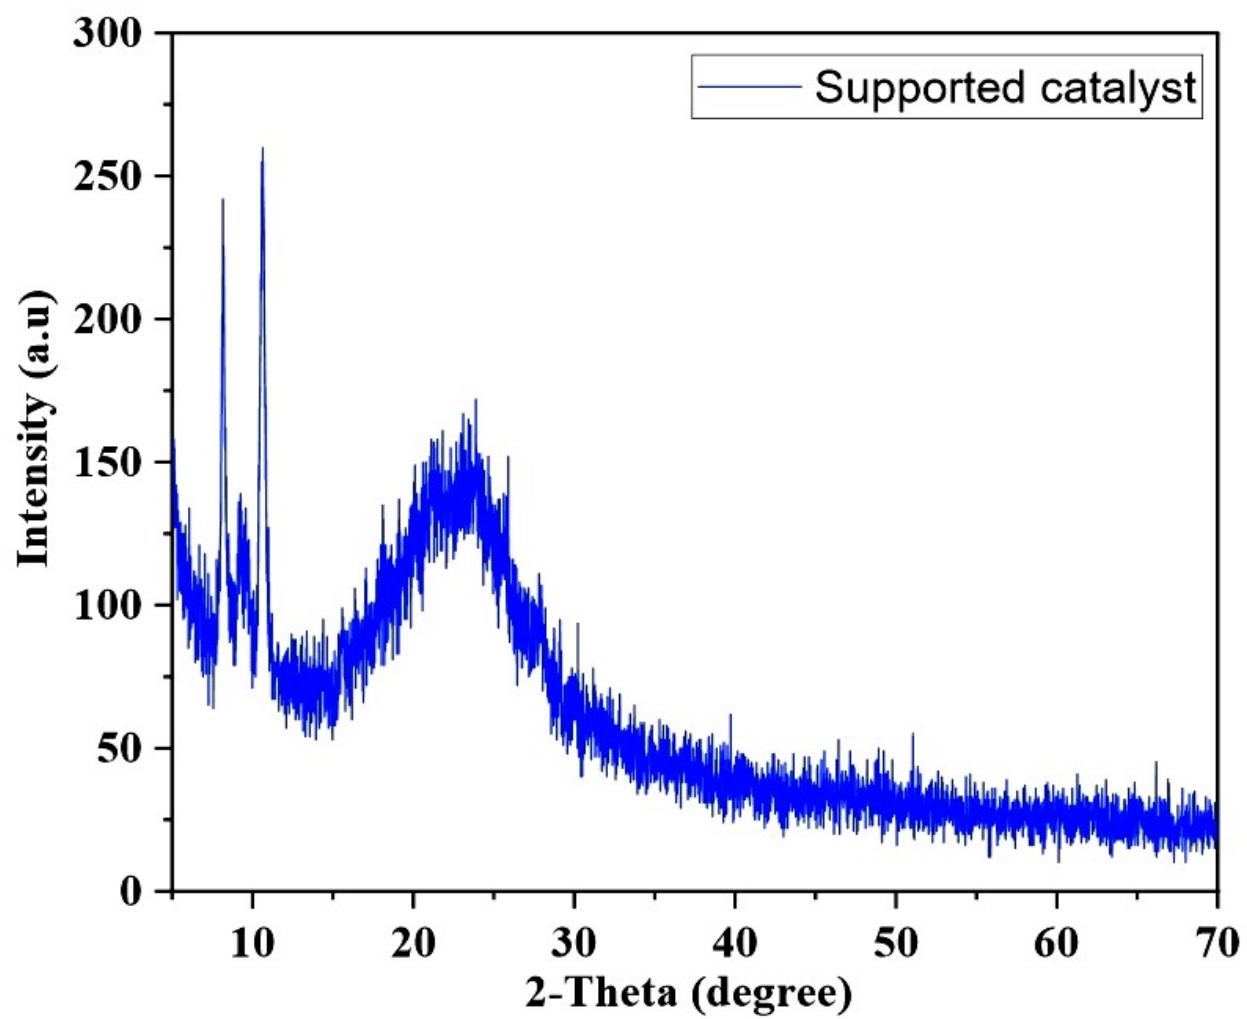

Fig. S16. XRD pattern of supported catalyst

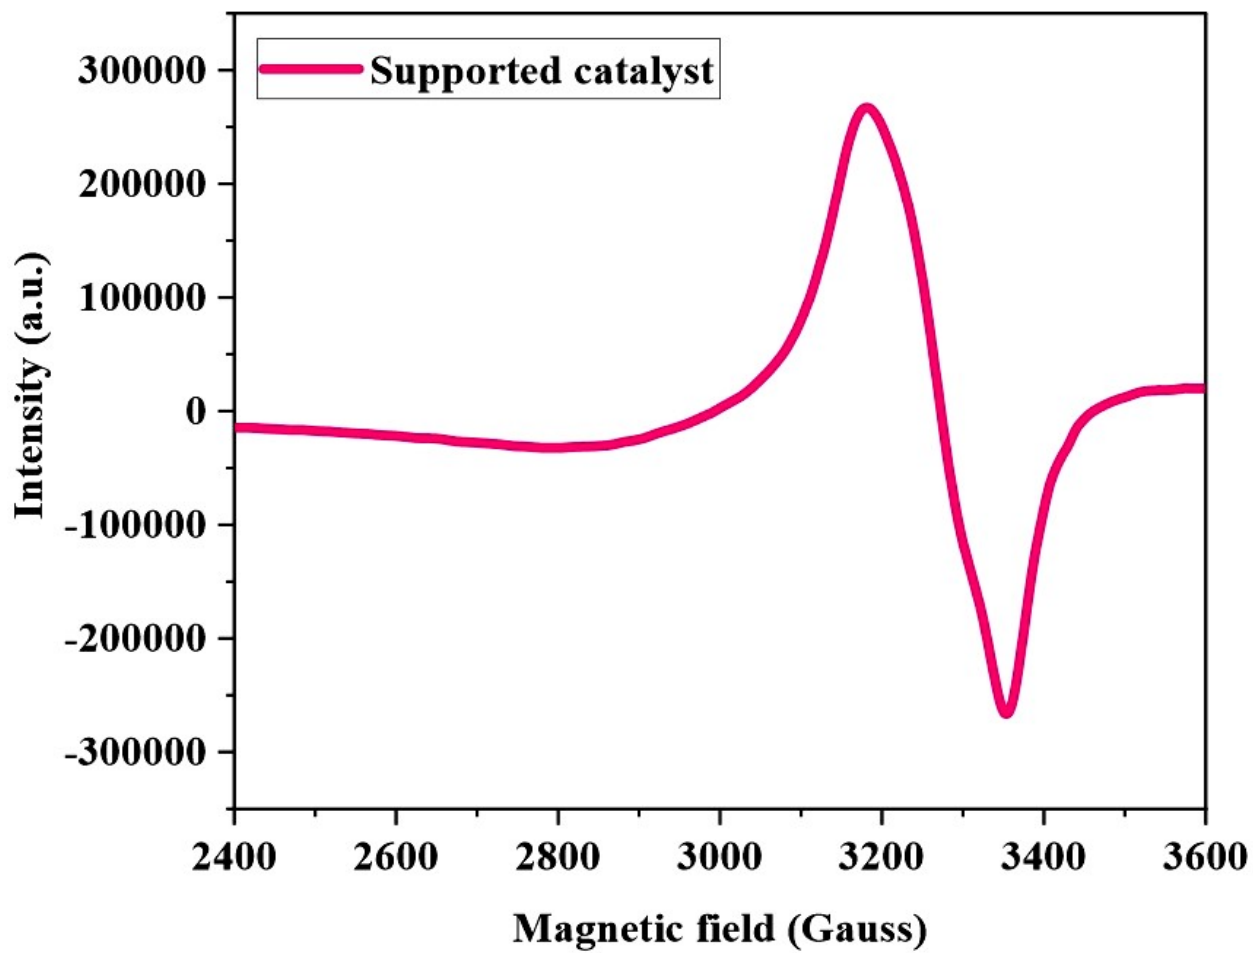

Fig. S17. EPR spectrum of the supported catalyst recorded at 77 K

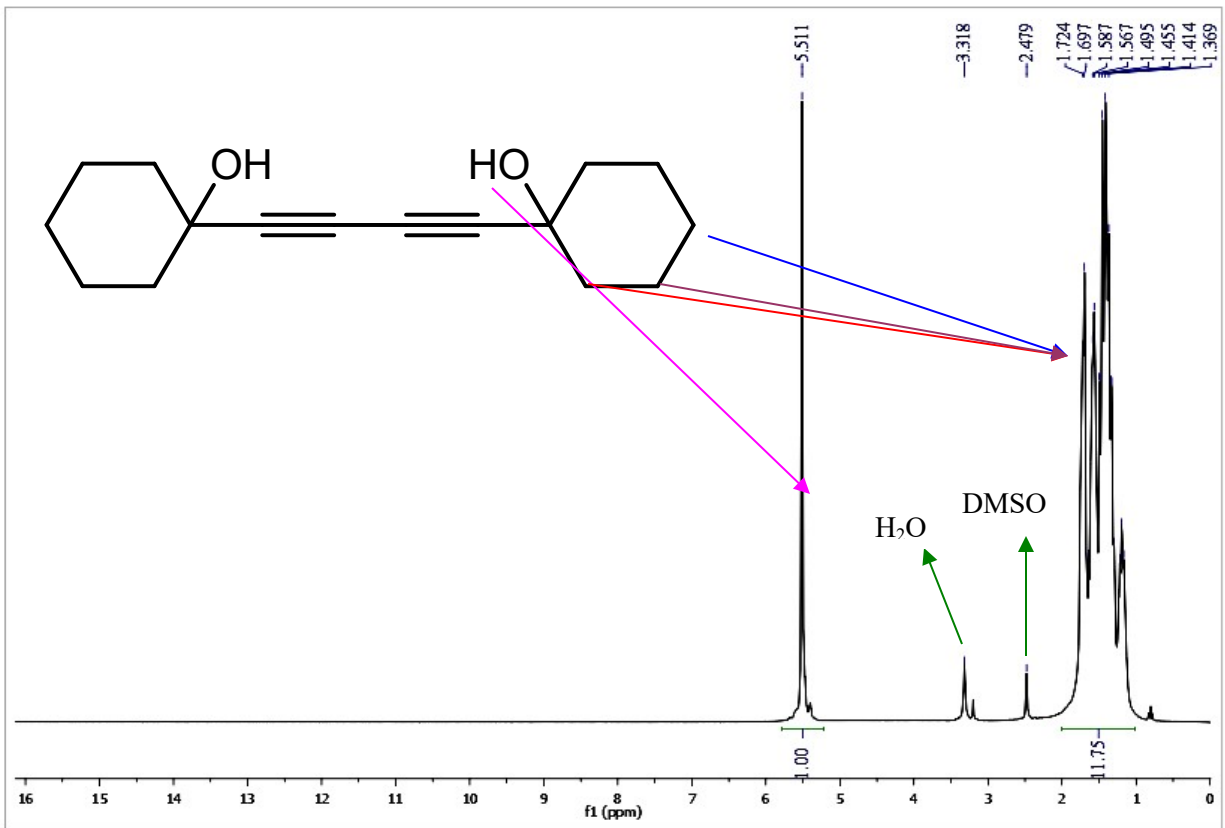

Fig. S2. <sup>1</sup>H NMR spectrum of CP1 in DMSO-d<sub>6</sub>

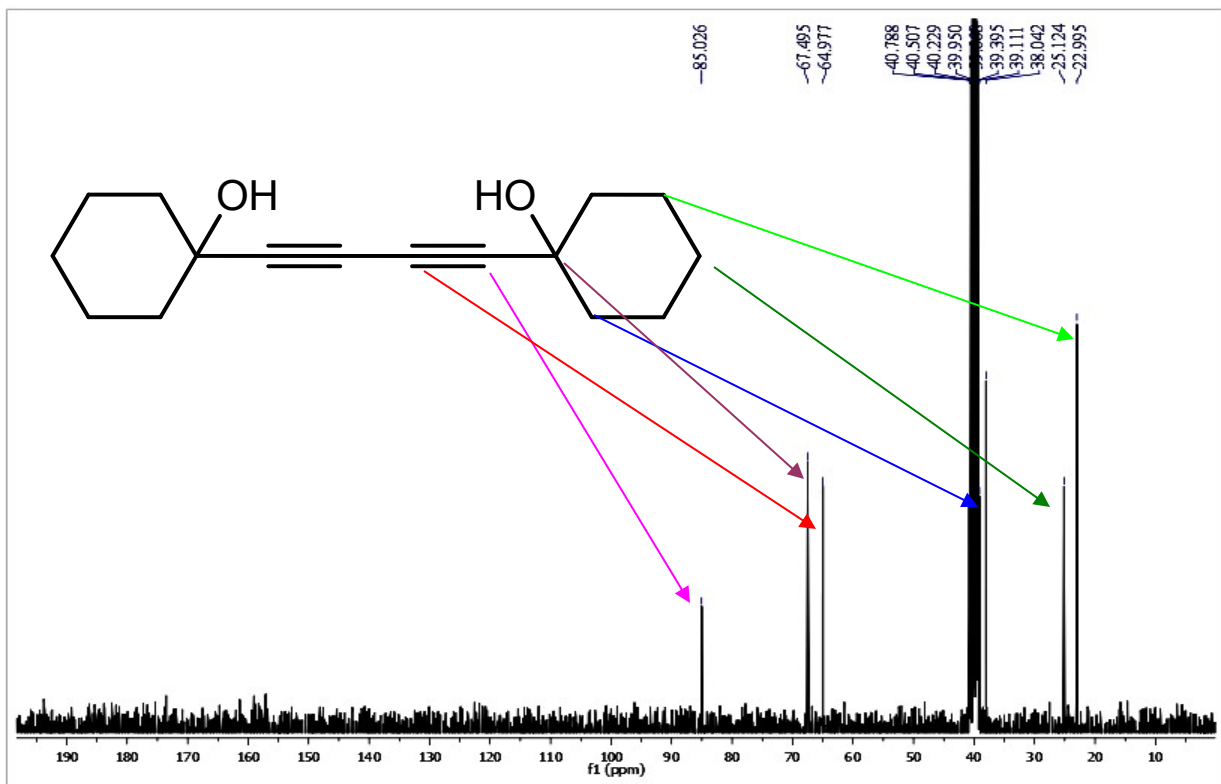

Fig. S2. <sup>13</sup>C NMR spectrum of CP1 in DMSO-d<sub>6</sub>

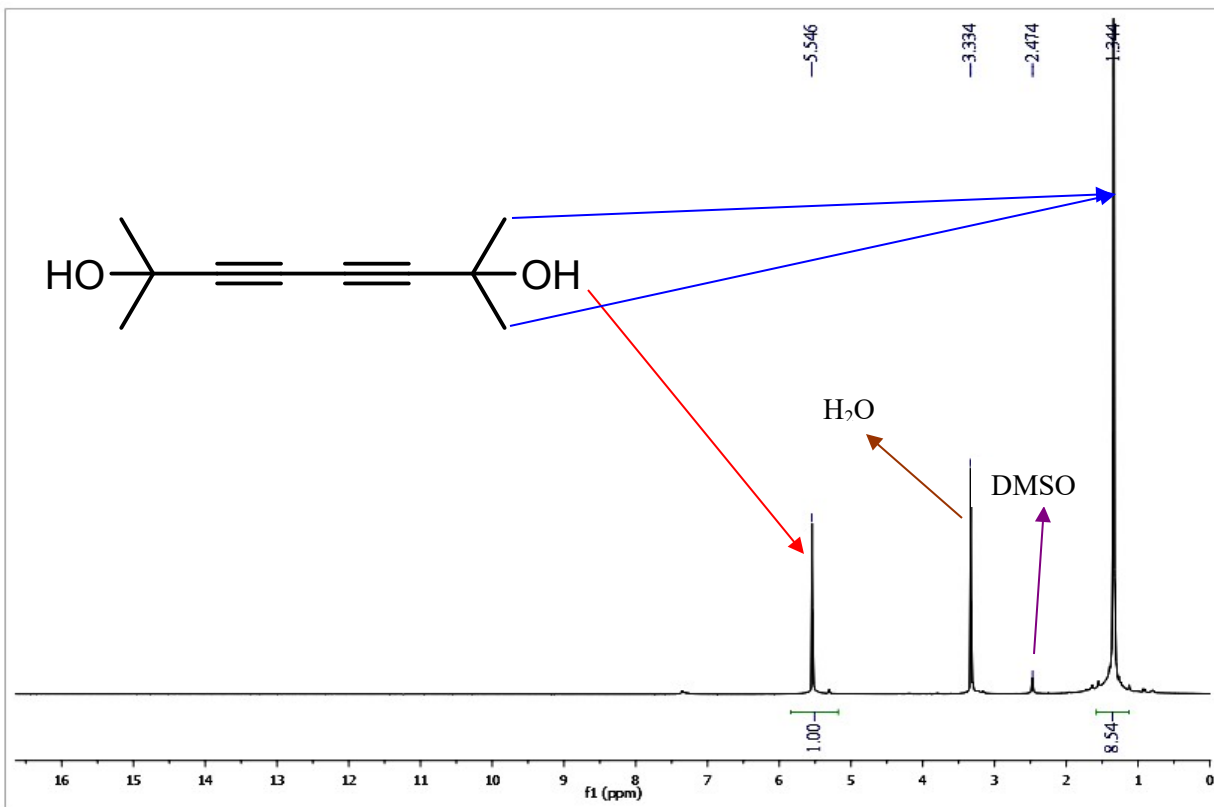

Fig. S2. <sup>1</sup>H NMR spectrum of CP2 in DMSO-d<sub>6</sub>

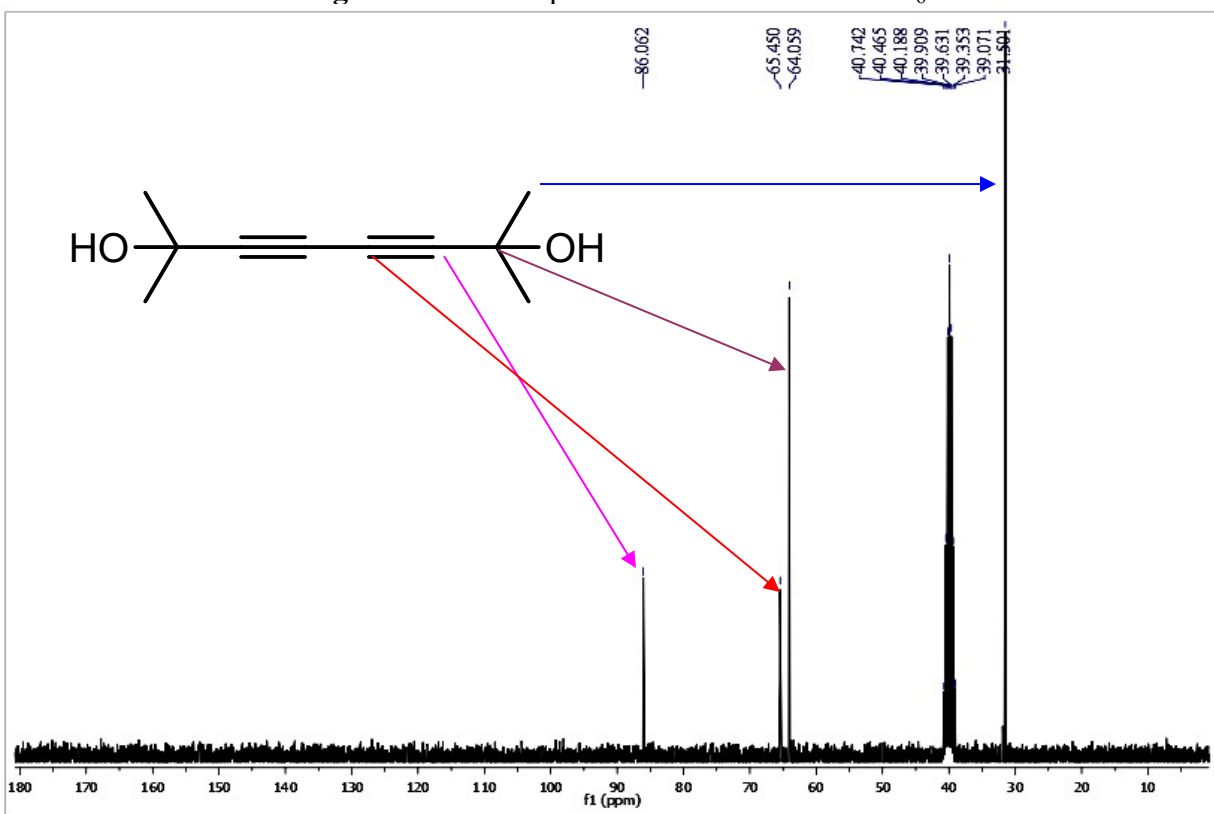

Fig. S2. <sup>13</sup>C NMR spectrum of CP2 in DMSO-d<sub>6</sub>

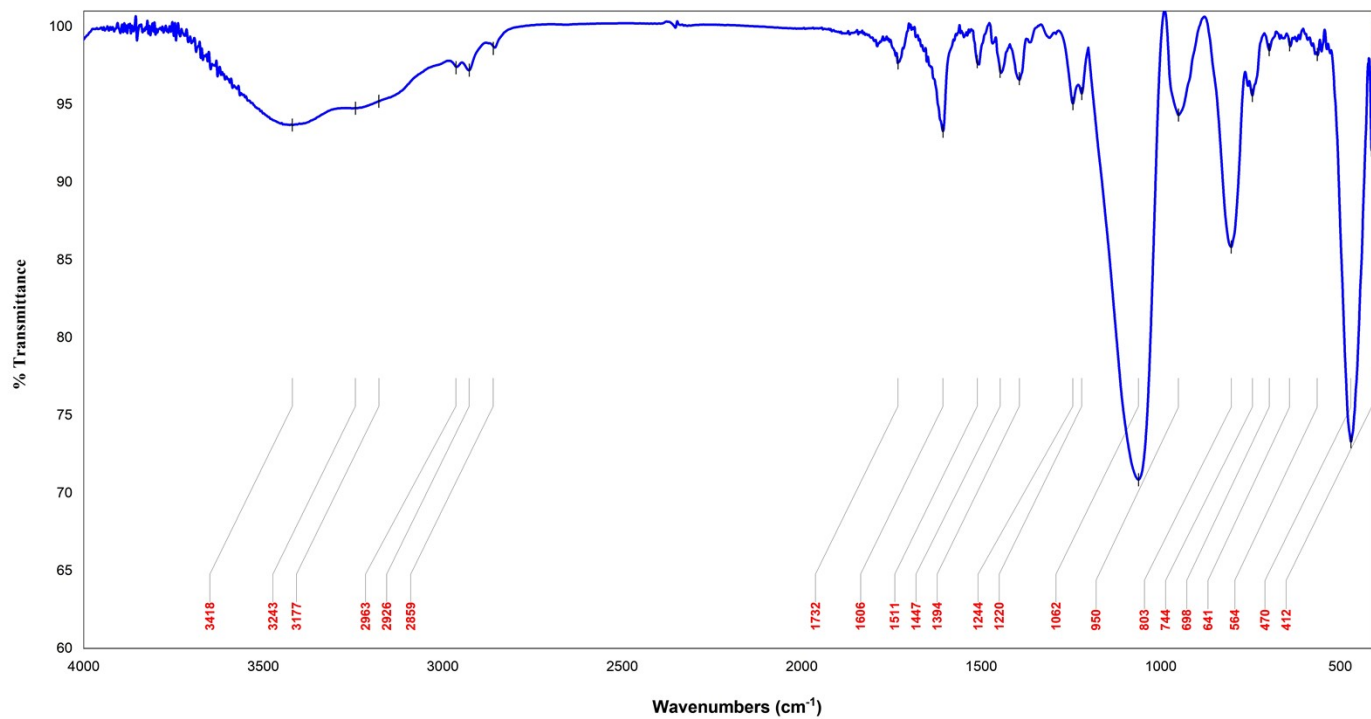

**Fig. S22.** FT-IR spectrum of the recovered catalyst

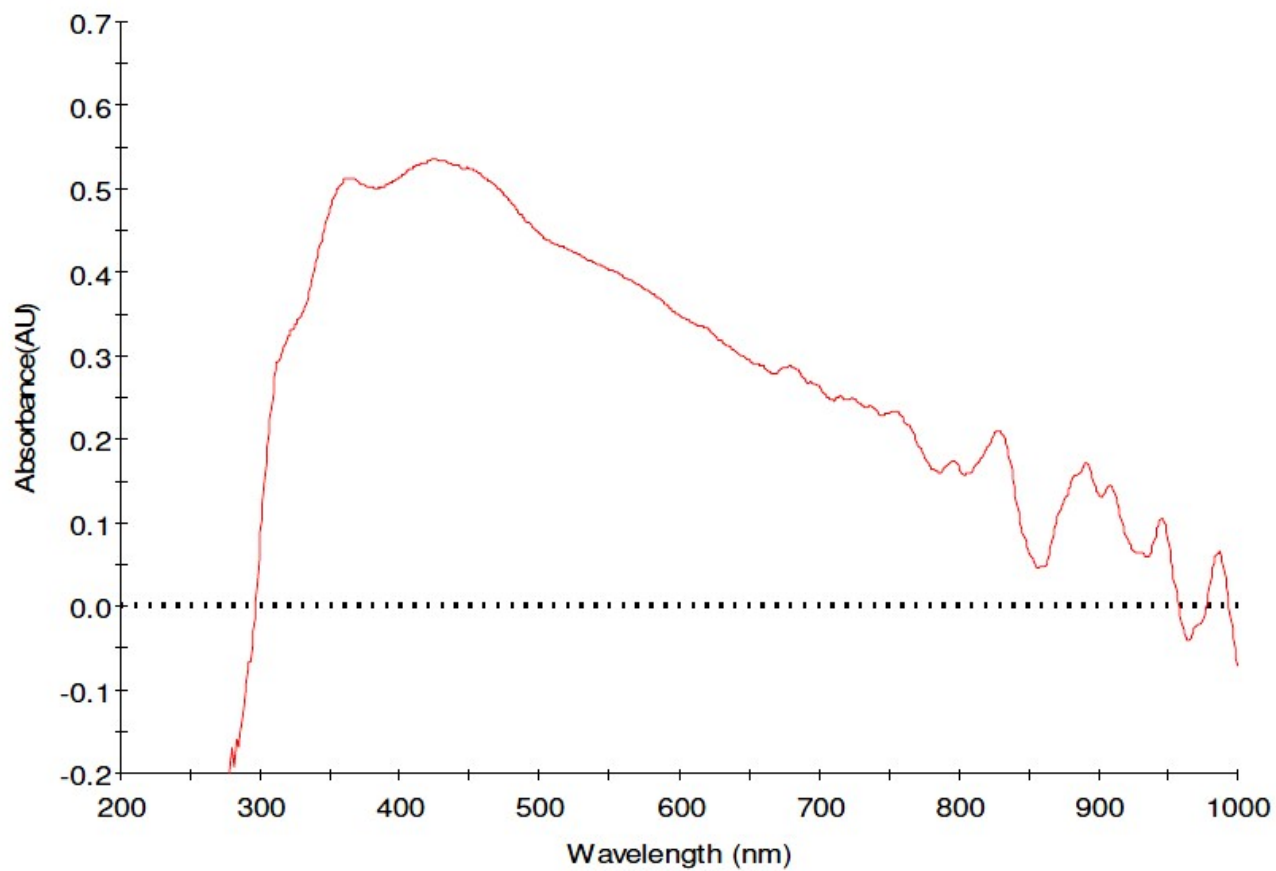

**Fig. S23.** DRS spectrum of recovered catalyst



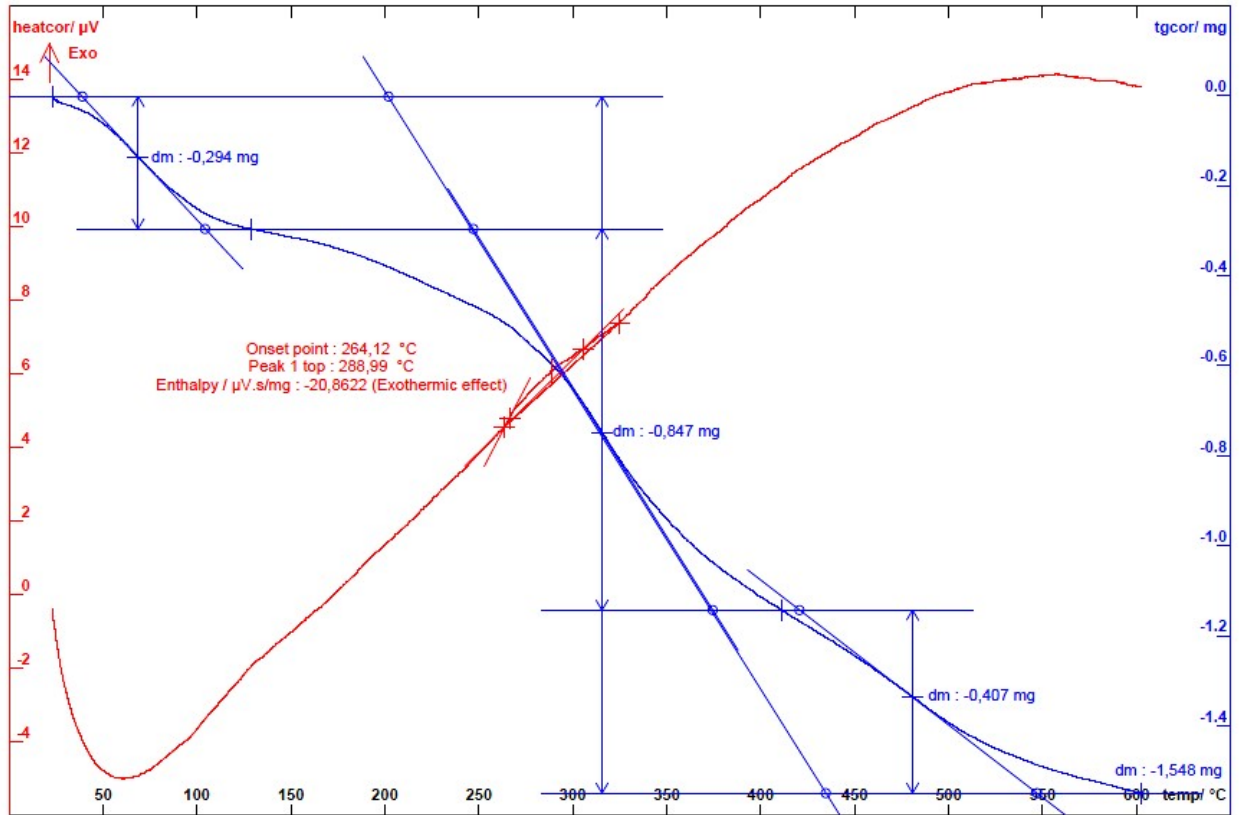

Fig. S24. TGA/DTA diagram of recovered catalyst

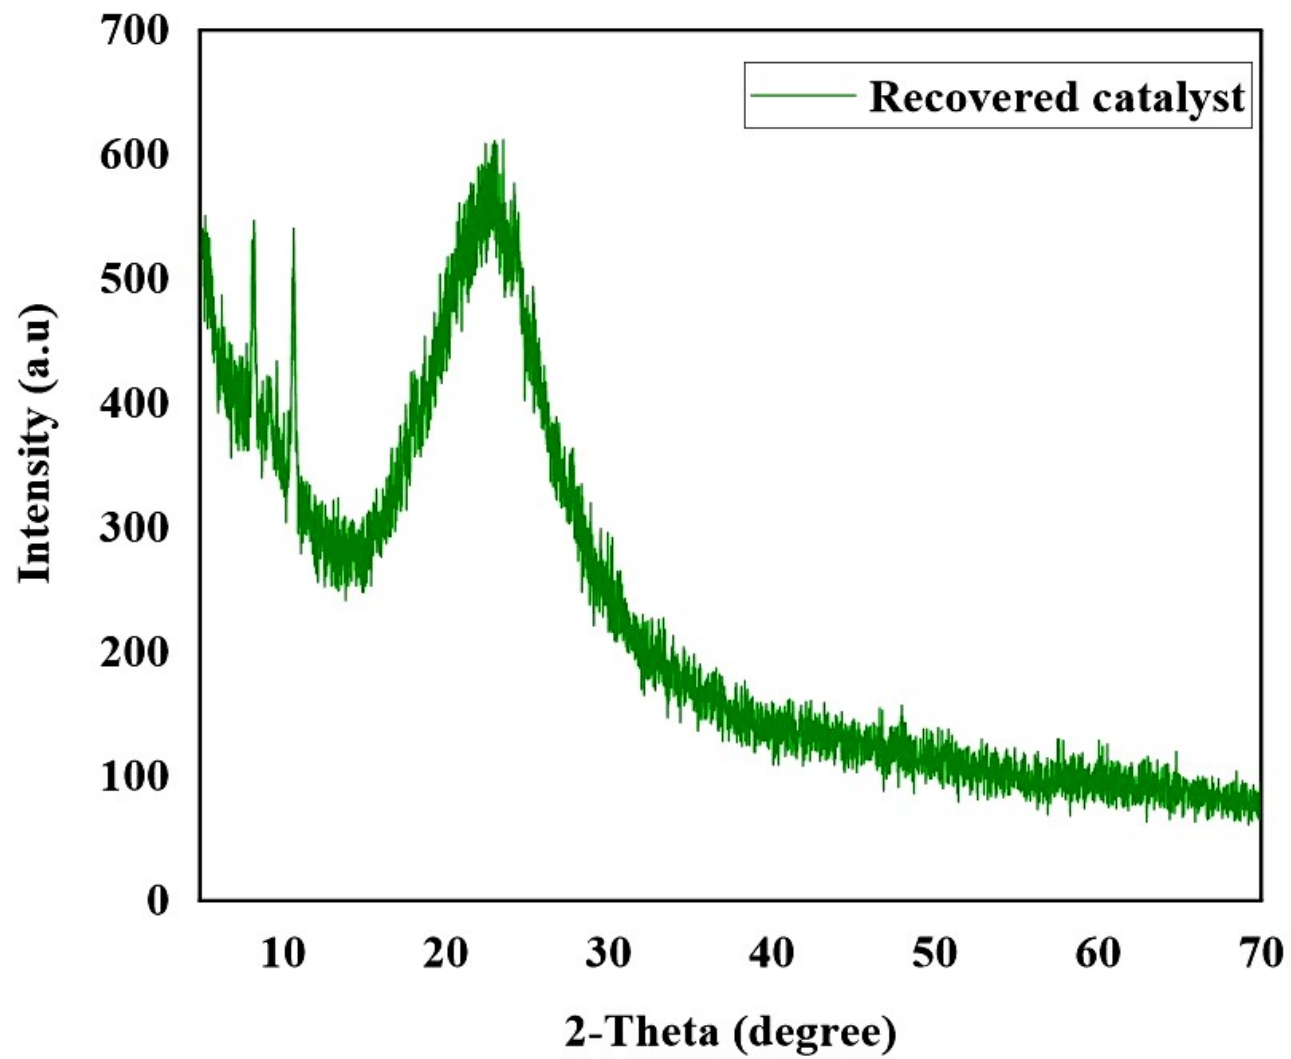

Fig. S25. XRD pattern of recovered catalyst

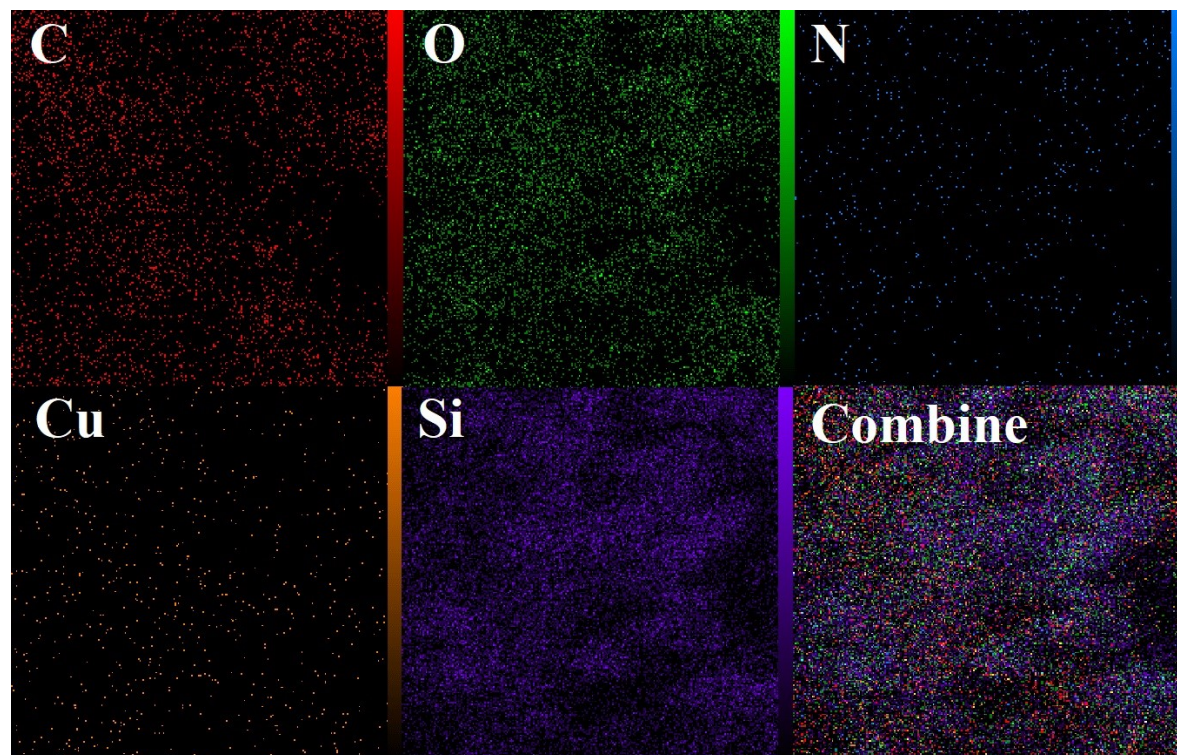

**Fig. S26.** EDS mapping images of the recovered **Si-Cu**

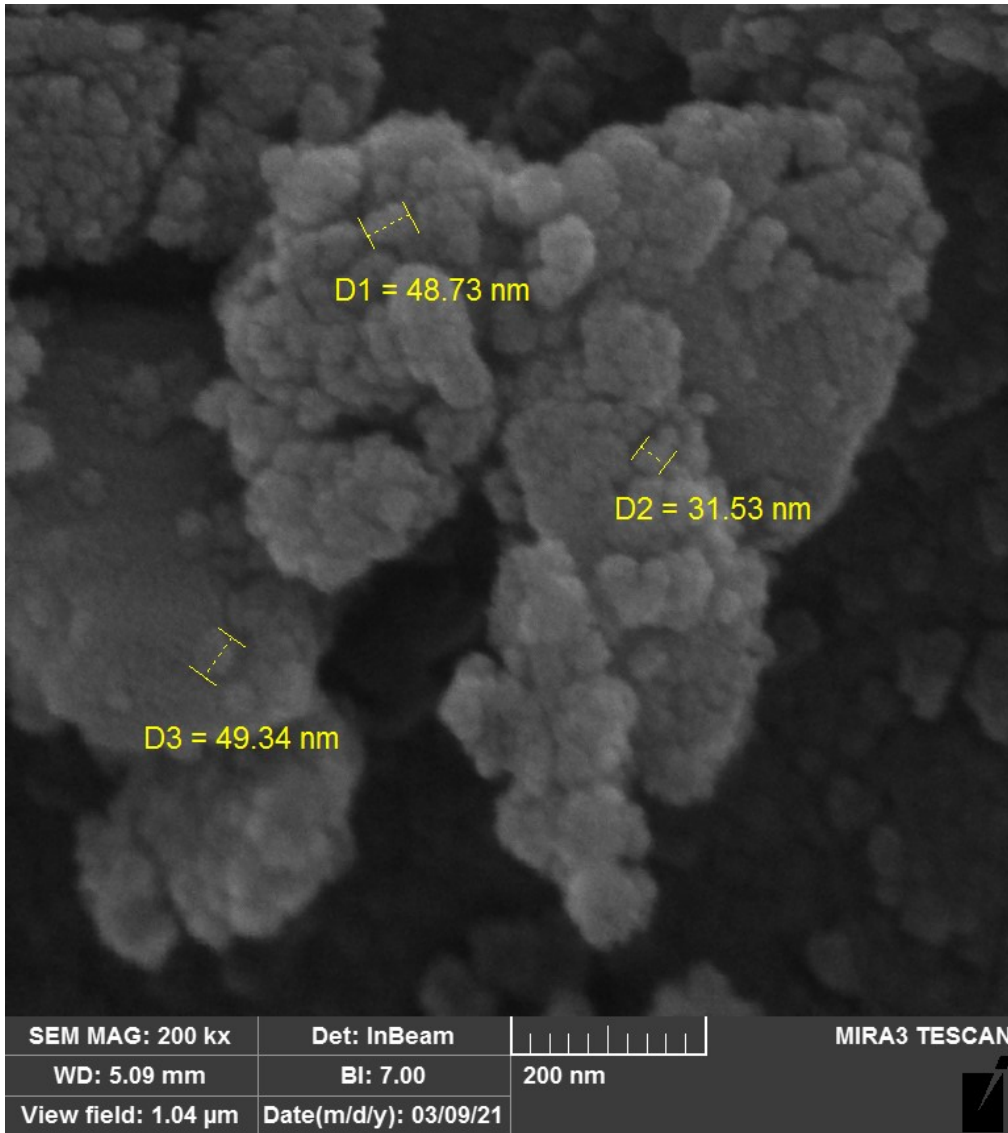

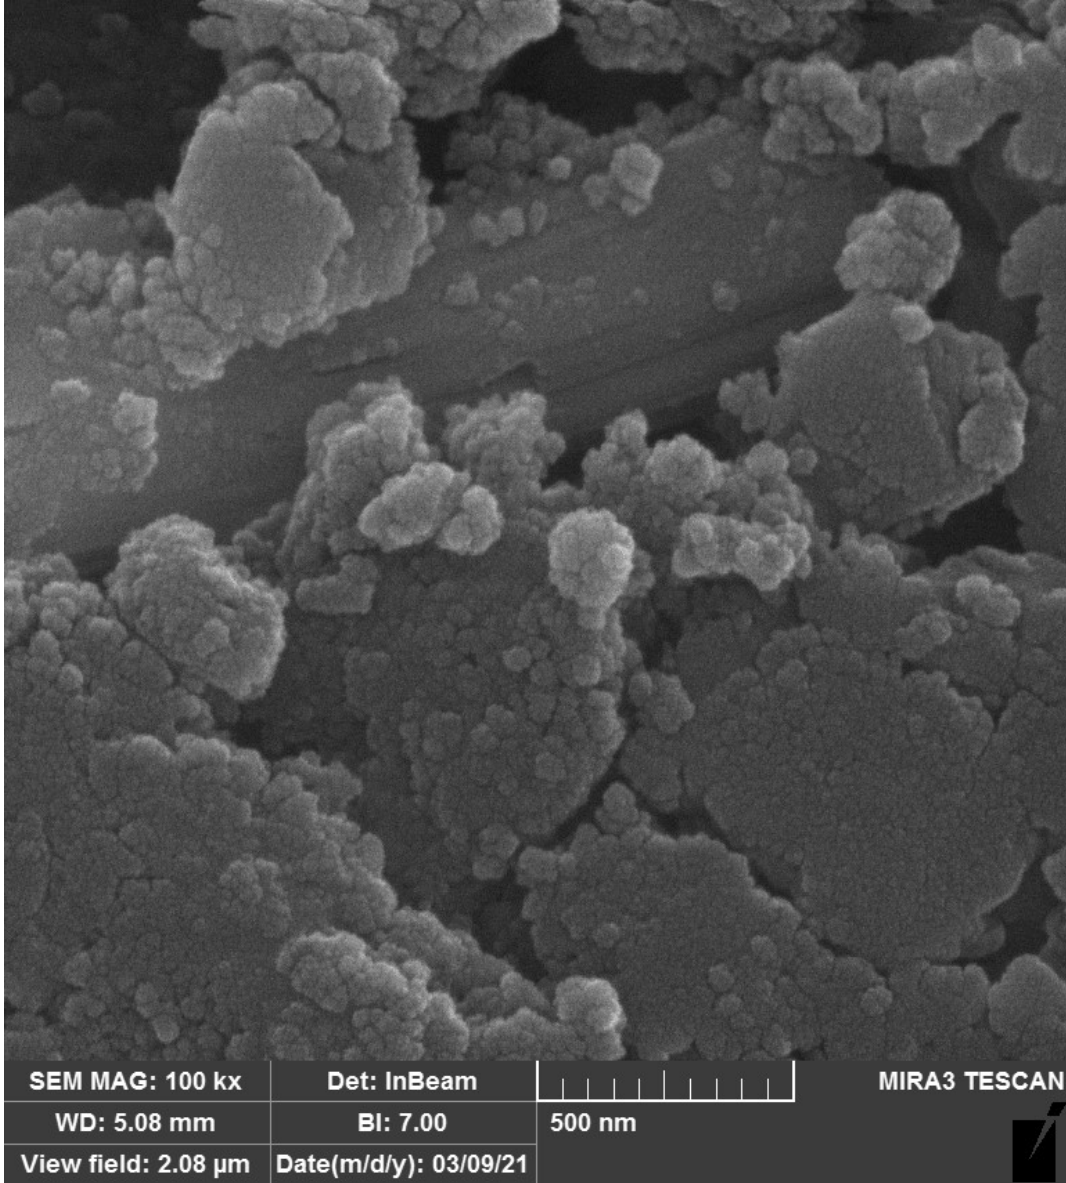

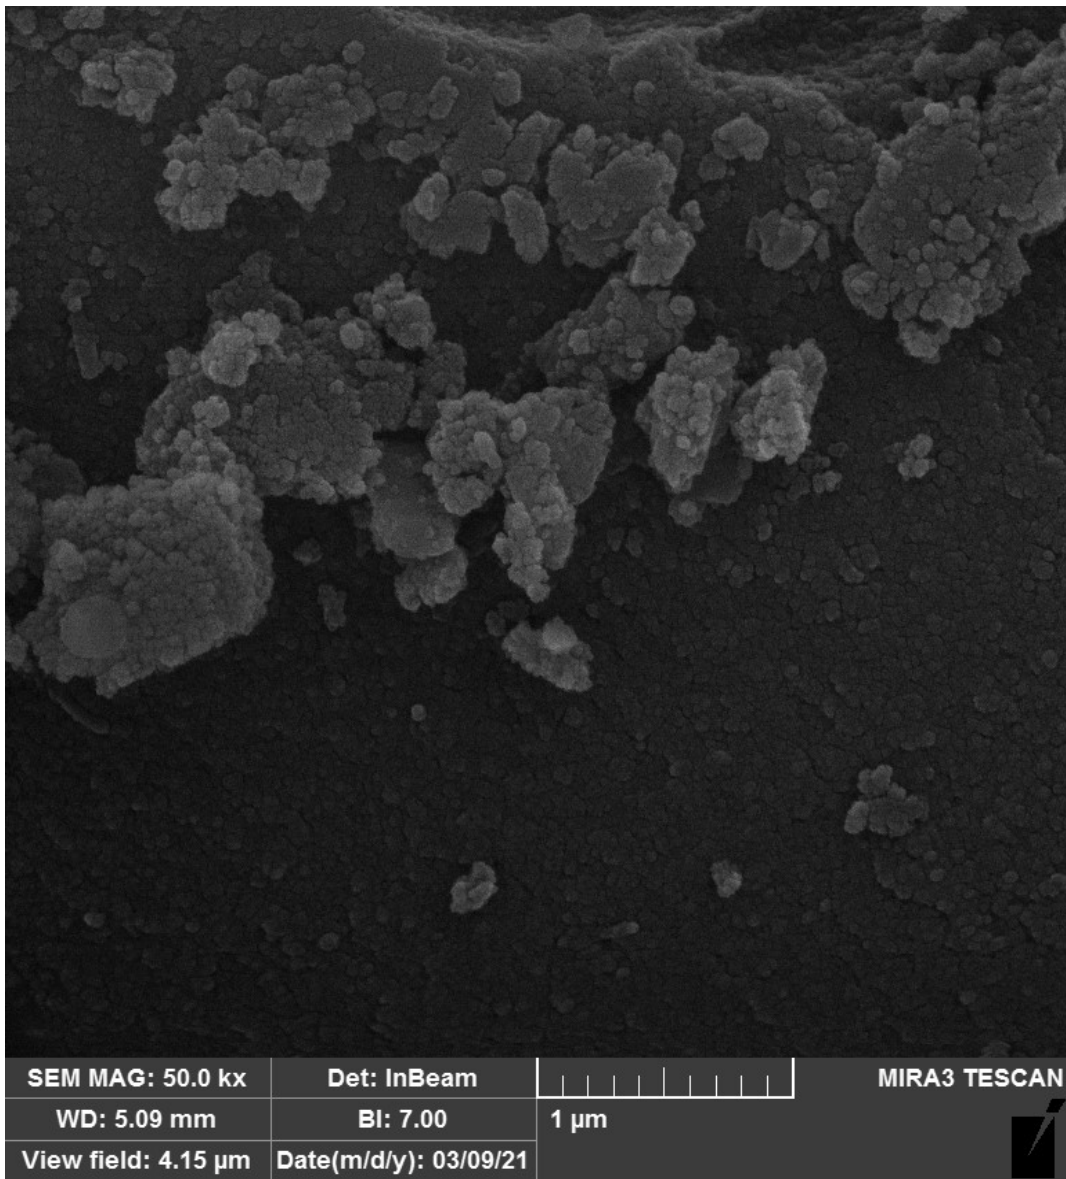

**Fig. S27.** SEM images of recovered catalyst



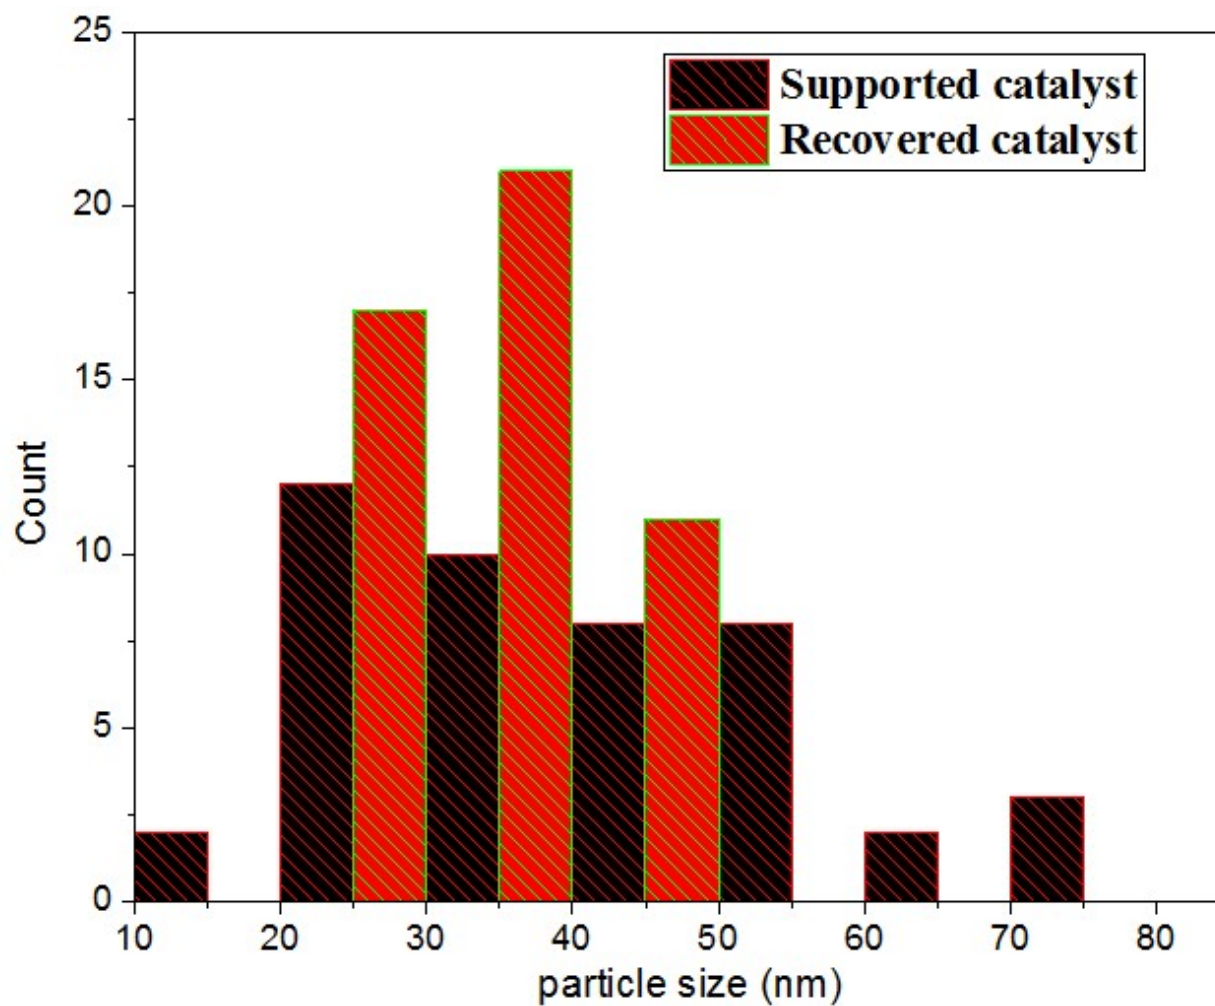

**Fig. S28.** Distribution of the size of particles obtained by using the analysis of variance (ANOVA) and Tukey's test

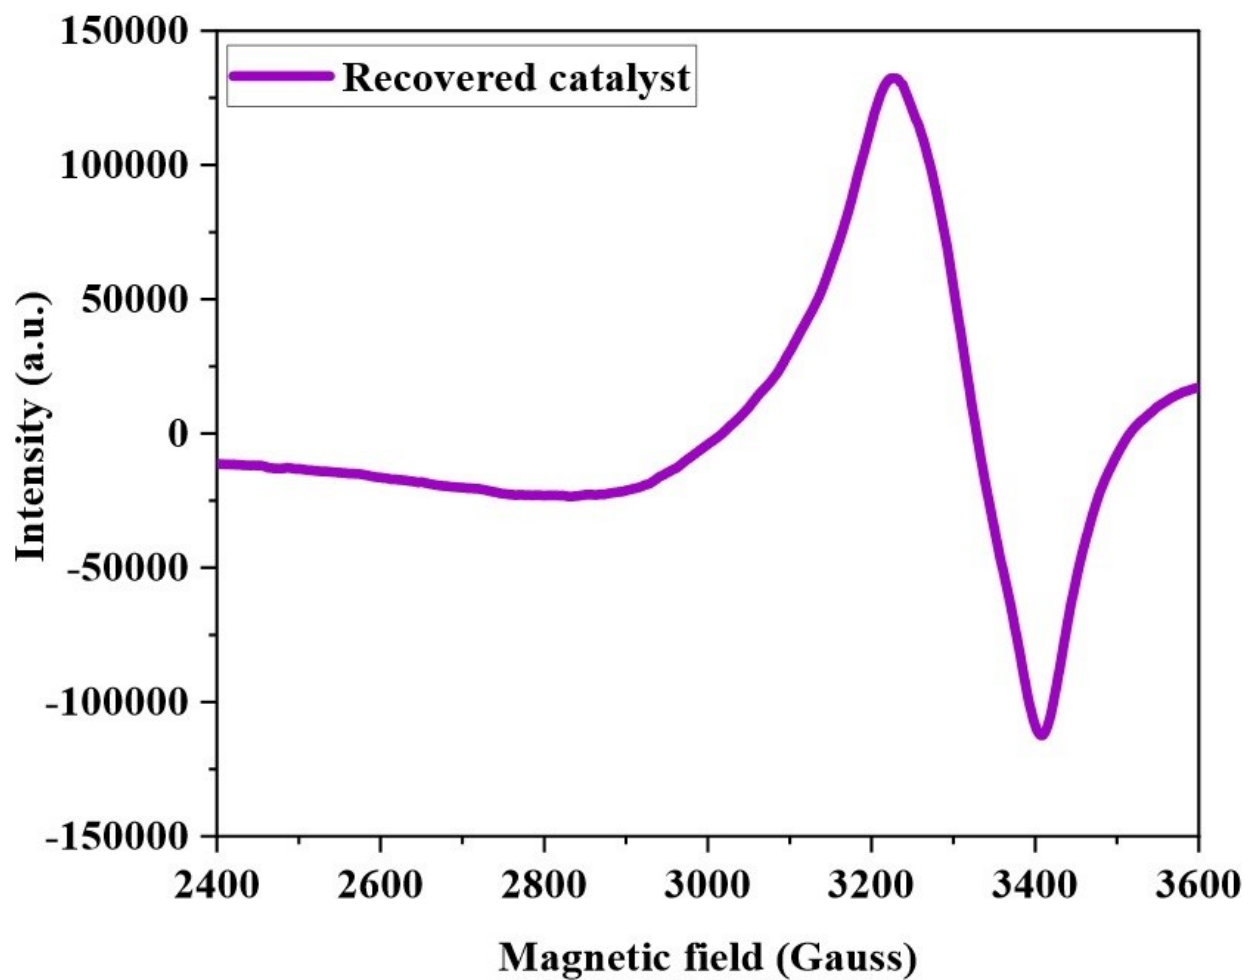

**Fig. S29.** The EPR spectrum of the recovered Si-Cu recorded at room temperature



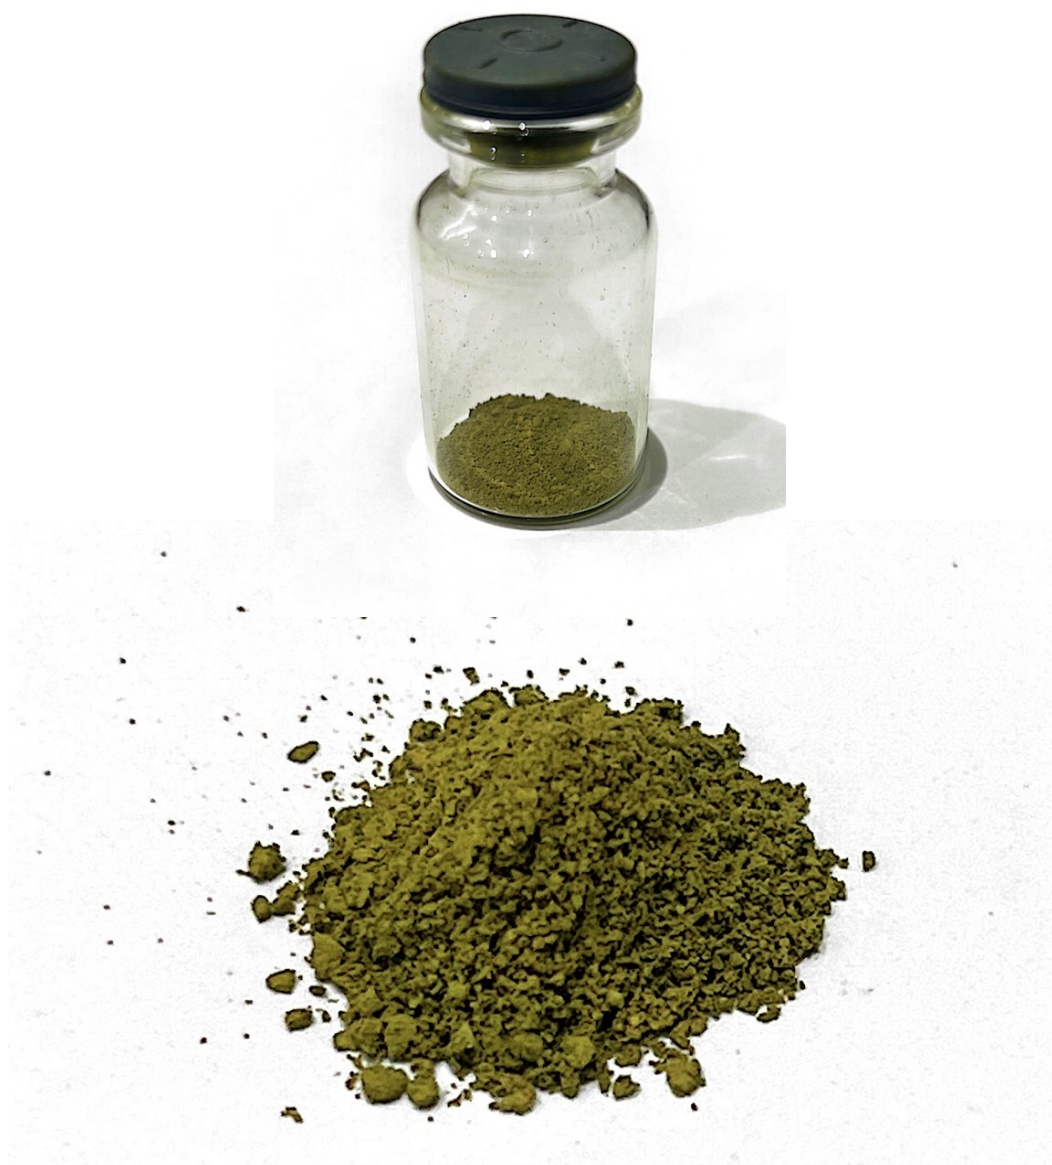

**Fig. 30.** Green powder (Si-Cu) obtained from the reaction of compound **1** and propionyl chloride functionalized silica gel

---

<sup>i</sup> Agilent Technologies, 2010, *CrysAlis PRO* Version 1.171.35.15.
